# Supplementary material
Source: PubMed Central journal article supplement (PMC8345317)

## Online Appendix A

**Figure A.1.** Trends in Female Participation and Unemployment Rates by Educational Attainment and Country (Ages 15 to 64)

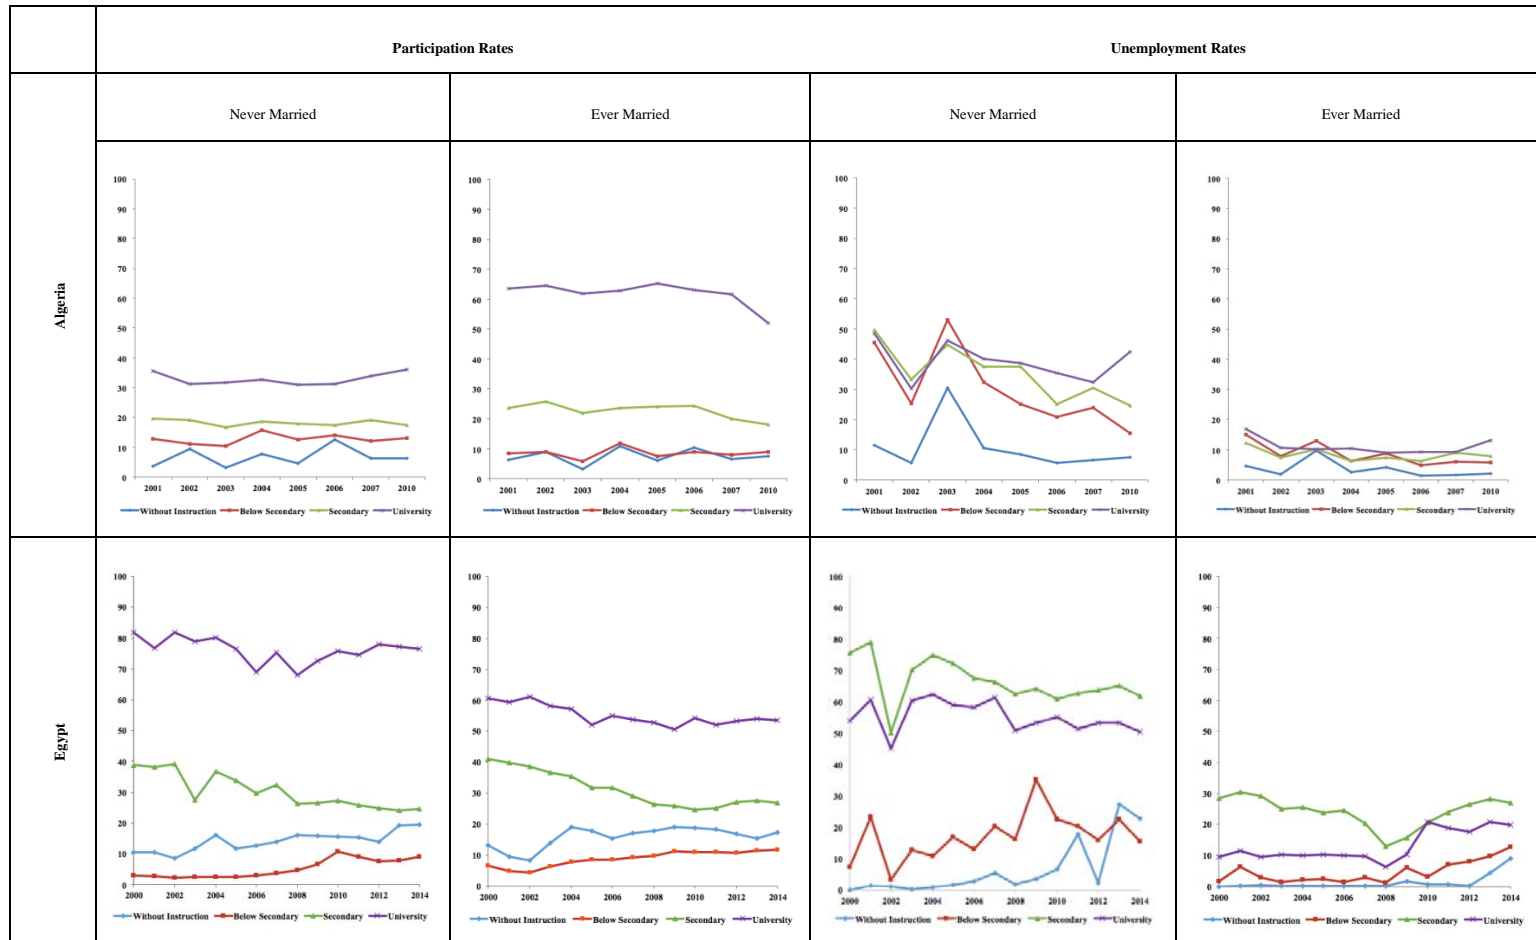

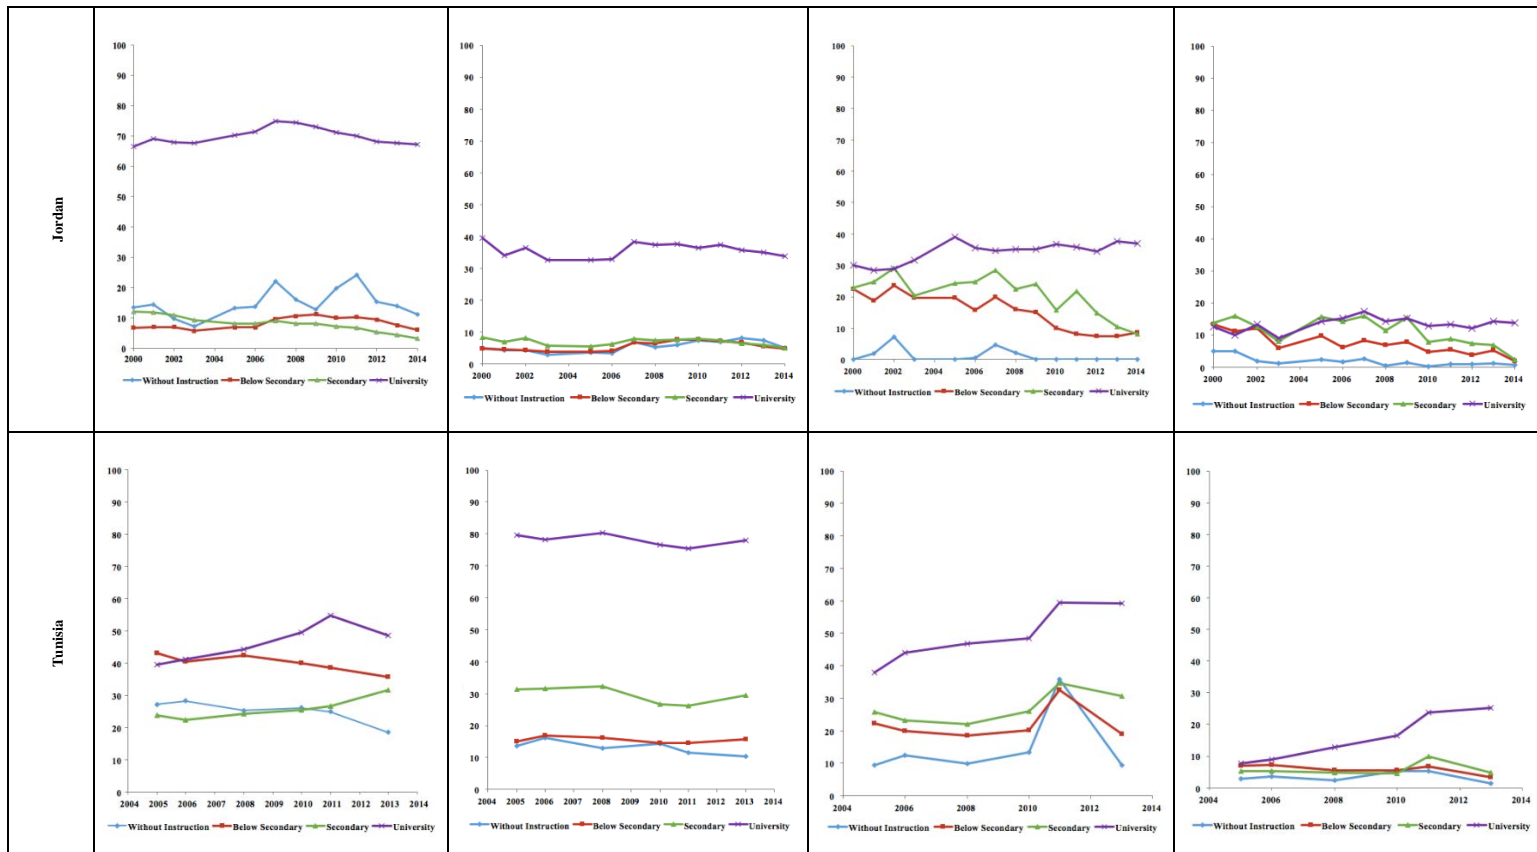

Source: Computed by the authors based on data from official labor force surveys in each of the four countries. See data section in text for details.

**Table A.1.** Odds Ratios from Multinomial Logit Estimates of the Probabilities of Participation in Government Work, Private Wage Work, Private Non-Wage Work, and Unemployment. Year: 2010. Ages 15 to 64 by Marital Status and Gender

**Panel A:** Never Married Women

|                                                 | Government work |          |          |           | Private Wage Work |          |          |          | Private Non-Wage Work |          |          |          | Unemployment |          |          |          |
|-------------------------------------------------|-----------------|----------|----------|-----------|-------------------|----------|----------|----------|-----------------------|----------|----------|----------|--------------|----------|----------|----------|
|                                                 | DZ              | EG       | JO       | TN        | DZ                | EG       | JO       | TN       | DZ                    | EG       | JO       | TN       | DZ           | EG       | JO       | TN       |
| Age                                             | 2.330***        | 1.897*** | 2.224*** | 2.258***  | 1.981***          | 1.644*** | 1.880*** | 1.729*** | 1.471***              | 1.233*** | 1.773*** | 1.569*** | 3.582***     | 1.490*** | 2.446*** | 2.168*** |
|                                                 | -0.112          | -0.088   | -0.081   | -0.060    | -0.128            | -0.077   | -0.053   | -0.022   | -0.069                | -0.065   | -0.176   | -0.026   | -0.316       | -0.080   | -0.145   | -0.044   |
| Age squared                                     | 0.346***        | 0.468*** | 0.348*** | 0.376***  | 0.367***          | 0.500*** | 0.397*** | 0.452*** | 0.611***              | 0.775*** | 0.475*** | 0.573*** | 0.124***     | 0.498*** | 0.217*** | 0.303*** |
|                                                 | -0.025          | -0.034   | -0.019   | -0.015    | -0.039            | -0.041   | -0.018   | -0.009   | -0.044                | -0.064   | -0.069   | -0.014   | -0.020       | -0.053   | -0.023   | -0.011   |
| <i>Educational Attainment (ref: university)</i> |                 |          |          |           |                   |          |          |          |                       |          |          |          |              |          |          |          |
| No certificate                                  | 0.009***        | 0.004*** | 0.004*** | 0.005***  | 0.127***          | 0.095*** | 0.144*** | 0.479*** | 1.489                 | 0.746    | 0.088*** | 1.025    | 0.015***     | 0.007*** | 0.003*** | 0.068*** |
|                                                 | -0.003          | -0.001   | -0.002   | -0.001    | -0.049            | -0.014   | -0.017   | -0.028   | -0.405                | -0.169   | -0.048   | -0.091   | -0.007       | -0.001   | -0.002   | -0.005   |
| Less than secondary certificate                 | 0.049***        | 0.006*** | 0.022*** | 0.0159*** | 0.924             | 0.076*** | 0.165*** | 1.082**  | 4.318***              | 0.198*** | 0.175*** | 1.536*** | 0.104***     | 0.012*** | 0.031*** | 0.177*** |
|                                                 | -0.007          | -0.003   | -0.002   | -0.002    |                   | -0.011   | -0.012   | -0.043   |                       | -0.052   | -0.046   | -0.123   |              | -0.002   | -0.003   | -0.008   |
| Secondary certificate                           | -0.007          |          |          |           | -0.131            |          |          |          | -0.949                |          |          |          | -0.013       |          |          |          |
|                                                 | 0.289***        | 0.080*** | 0.117*** | 0.149***  | 1.265             | 0.161*** | 0.140*** | 1.399*** | 4.163***              | 0.243*** | 0.134*** | 1.591*** | 0.386***     | 0.110*** | 0.093*** | 0.320*** |

|                                            |                 |                 |                 |                 |                 |             |                 |                 |                 |             |                 |                 |                 |          |                 |                 |
|--------------------------------------------|-----------------|-----------------|-----------------|-----------------|-----------------|-------------|-----------------|-----------------|-----------------|-------------|-----------------|-----------------|-----------------|----------|-----------------|-----------------|
|                                            | -0.031          | -0.008          | -0.009          | -0.009          | -0.189          | -0.015      | -0.010          | -0.049          | -0.958          | -0.054      | -0.038          | -0.124          | -0.041          | -0.007   | -0.007          | -0.010          |
| HH members working<br>in the Government    | 1.294***        | 1.461***        | 1.246***        | 1.948***        | 0.813*          | 0.648***    | 0.892***        | 0.917**         | 0.812*          | 0.590***    | 0.787           | 0.816***        | 1.074           | 0.757*** | 1.019           | 0.920**         |
|                                            | -0.116          | -0.134          | -0.045          | -0.104          | -0.092          | -0.053      | -0.032          | -0.032          | -0.087          | -0.098      | -0.135          | -0.057          | -0.095          | -0.038   | -0.035          | -0.033          |
| HH members with a<br>private wage work     | 0.915           | 1.320***        | 0.961           | 0.936           | 1.418***        | 3.024***    | 1.317***        | 2.746***        | 1.246**         | 0.799*      | 1.195           | 0.749***        | 1.041           | 1.261*** | 0.947           | 1.173***        |
|                                            | -0.085          | -0.124          | -0.046          | -0.051          | -0.155          | -0.224      | -0.038          | -0.072          | -0.127          | -0.106      | -0.145          | -0.035          | -0.093          | -0.062   | -0.038          | -0.034          |
| HH members with a<br>private non-wage work | 0.713***        | 0.953           | 0.909           | 0.809***        | 0.860           | 1.049       | 1.139**         | 0.790***        | 2.143***        | 8.635***    | 1.755***        | 3.560***        | 0.880           | 1.000    | 0.809***        | 0.792***        |
|                                            | -0.067          | -0.103          | -0.077          | -0.049          | -0.098          | -0.088      | -0.064          | -0.023          | -0.223          | -1.413      | -0.325          | -0.158          | -0.080          | -0.053   | -0.058          | -0.025          |
| Children <2                                | 0.767*          | 0.853           | 0.866           | 0.787           | 0.667**         | 0.780       | 1.233*          | 0.706***        | 0.679**         | 1.034       | 0.308           | 0.746***        | 0.982           | 0.803*   | 1.325*          | 1.080           |
|                                            | -0.118          | -0.213          | -0.178          | -0.132          | -0.137          | -0.145      | -0.153          | -0.053          | -0.115          | -0.219      | -0.319          | -0.081          | -0.143          | -0.093   | -0.193          | -0.085          |
| Children between 3<br>and 5                | 0.898           | 0.802           | 0.963           | 0.924           | 0.851           | 0.902       | 1.071           | 0.995           | 1.105           | 0.935       | 1.388           | 1.122           | 1.062           | 1.135    | 0.870           | 1.027           |
|                                            | -0.152          | -0.176          | -0.163          | -0.166          | -0.178          | -0.130      | -0.119          | -0.067          | -0.188          | -0.168      | -0.768          | -0.115          | -0.164          | -0.096   | -0.112          | -0.081          |
| Children between 6<br>and 11               | 0.996           | 1.070           | 1.107           | 0.793**         | 1.560***        | 1.069       | 0.948           | 0.832***        | 0.881           | 0.864       | 0.495*          | 0.872**         | 1.083           | 0.897*   | 0.977           | 0.884***        |
|                                            | -0.122          | -0.129          | -0.113          | -0.081          | -0.214          | -0.096      | -0.071          | -0.033          | -0.118          | -0.116      | -0.205          | -0.059          | -0.118          | -0.051   | -0.077          | -0.039          |
| Children between 12<br>and 17              | 1.165           | 1.116           | 0.893           | 0.764***        | 0.976           | 1.091       | 0.779***        | 0.859***        | 1.078           | 1.017       | 0.991           | 0.904*          | 1.037           | 1.073    | 0.923           | 1.048           |
|                                            | -0.127          | -0.116          | -0.076          | -0.061          | -0.125          | -0.087      | -0.049          | -0.028          | -0.125          | -0.121      | -0.288          | -0.051          | -0.102          | -0.053   | -0.061          | -0.037          |
| Children >17                               | 1.142           | 1.017           | 1.143           | 0.836**         | 1.101           | 1.417***    | 0.911           | 0.894***        | 1.232*          | 1.189       | 1.008           | 0.965           | 1.248**         | 1.048    | 0.922           | 1.055           |
|                                            | -0.125          | -0.110          | -0.102          | -0.067          | -0.142          | -0.114      | -0.060          | -0.029          | -0.145          | -0.144      | -0.311          | -0.056          | -0.122          | -0.054   | -0.065          | -0.038          |
| Constant                                   | 1.35e-<br>07*** | 8.38e-<br>06*** | 7.82e-<br>07*** | 9.95e-<br>08*** | 2.38e-<br>06*** | 0.000240*** | 2.61e-<br>05*** | 2.27e-<br>05*** | 1.32e-<br>05*** | 0.000214*** | 1.56e-<br>06*** | 6.65e-<br>06*** | 2.67e-<br>09*** | 0.010*** | 4.28e-<br>06*** | 4.17e-<br>06*** |

|                                  |            |              |              |              |            |              |              |              |            |            |           |              |            |              |              |              |       |
|----------------------------------|------------|--------------|--------------|--------------|------------|--------------|--------------|--------------|------------|------------|-----------|--------------|------------|--------------|--------------|--------------|-------|
|                                  | 0.000      | 0.000        | 0.000        | 0.000        | 0.000      | 0.000        | 0.000        | 0.000        | 0.000      | 0.000      | 0.000     | 0.000        | 0.000      | 0.000        | -0.005       | 0.000        | 0.000 |
| <b>Regional dummies included</b> | yes        | yes          | yes          | yes          | yes        | yes          | yes          | yes          | yes        | yes        | yes       | yes          | yes        | yes          | yes          | yes          | yes   |
| <b>Observations</b>              | <b>773</b> | <b>1,071</b> | <b>1,239</b> | <b>2,200</b> | <b>397</b> | <b>1,239</b> | <b>2,139</b> | <b>9,975</b> | <b>464</b> | <b>556</b> | <b>89</b> | <b>3,126</b> | <b>692</b> | <b>3,245</b> | <b>1,674</b> | <b>7,214</b> |       |

**Note:** Standard errors in parentheses; \*\*\* p<0.01, \*\* p<0.05, \* p<0.1.

## Panel B: Currently Married Women

|                                                 | Government work |          |          |          | Private Wage Work |          |          |          | Private Non-Wage Work |          |          |          | Unemployment |          |          |          |
|-------------------------------------------------|-----------------|----------|----------|----------|-------------------|----------|----------|----------|-----------------------|----------|----------|----------|--------------|----------|----------|----------|
|                                                 | DZ              | EG       | JO       | TN       | DZ                | EG       | JO       | TN       | DZ                    | EG       | JO       | TN       | DZ           | EG       | JO       | TN       |
| Age                                             | 1.507***        | 1.277*** | 2.023*** | 1.711*** | 1.451***          | 1.229*** | 1.675*** | 1.305*** | 1.231***              | 1.073*** | 1.618*** | 1.235*** | 1.239*       | 0.898*** | 1.210*** | 1.132*** |
|                                                 | -0.086          | -0.023   | -0.061   | -0.035   | -0.182            | -0.042   | -0.049   | -0.019   | -0.047                | -0.012   | -0.120   | -0.017   | -0.148       | -0.023   | -0.068   | -0.029   |
| Age squared                                     | 0.652***        | 0.831*** | 0.401*** | 0.561*** | 0.603***          | 0.760*** | 0.462*** | 0.675*** | 0.767***              | 0.912*** | 0.550*** | 0.791*** | 0.704**      | 1.066*   | 0.671*** | 0.788*** |
|                                                 | -0.046          | -0.019   | -0.016   | -0.014   | -0.098            | -0.034   | -0.019   | -0.012   | -0.036                | -0.013   | -0.051   | -0.013   | -0.118       | -0.039   | -0.057   | -0.027   |
| <i>Educational Attainment (ref: university)</i> |                 |          |          |          |                   |          |          |          |                       |          |          |          |              |          |          |          |
| No certificate                                  | 0.005***        | 0.002*** | 0.006*** | 0.001*** | 0.035***          | 0.175*** | 0.475*** | 0.142*** | 0.548***              | 3.196*** | 0.231*** | 0.149*** | 0.003***     | 0.006*** | 0.011*** | 0.025*** |
|                                                 | -0.001          | 0.000    | -0.001   | 0.000    | -0.015            | -0.017   | -0.047   | -0.009   | -0.111                | -0.309   | -0.058   | -0.010   | -0.003       | -0.001   | -0.006   | -0.002   |
| Less than secondary certificate                 | 0.012***        | 0.007*** | 0.014*** | 0.003*** | 0.058***          | 0.118*** | 0.205*** | 0.180*** | 0.560***              | 1.366*** | 0.217*** | 0.125*** | 0.031***     | 0.014*** | 0.028*** | 0.018*** |
|                                                 | -0.002          | -0.001   | -0.001   | 0.000    | -0.018            | -0.018   | -0.015   | -0.009   | -0.107                | -0.148   | -0.039   | -0.008   | -0.009       | -0.003   | -0.004   | -0.001   |
| Secondary certificate                           | 0.117***        | 0.223*** | 0.137*** | 0.045*** | 0.150***          | 0.213*** | 0.309*** | 0.305*** | 0.560***              | 1.360*** | 0.379*** | 0.187*** | 0.105***     | 0.233*** | 0.154*** | 0.028*** |
|                                                 | -0.014          | -0.008   | -0.007   | -0.002   | -0.046            | -0.019   | -0.023   | -0.015   | -0.114                | -0.134   | -0.068   | -0.012   | -0.026       | -0.012   | -0.015   | -0.002   |
| HH members working in the Government            | 1.182           | 1.945*** | 1.335*** | 2.034*** | 0.319***          | 0.771*** | 0.889**  | 0.702*** | 0.807**               | 1.123*** | 1.132    | 0.960    | 0.812        | 1.403*** | 0.856    | 0.809*** |
|                                                 | -0.153          | -0.087   | -0.060   | -0.095   | -0.099            | -0.075   | -0.051   | -0.032   | -0.075                | -0.042   | -0.119   | -0.042   | -0.215       | -0.095   | -0.092   | -0.067   |
| HH members with a private wage work             | 0.457***        | 0.728*** | 0.619*** | 0.611*** | 0.909             | 1.311*** | 1.081*   | 1.291*** | 0.802**               | 0.898*** | 1.156    | 0.807*** | 1.226        | 1.245*** | 0.633*** | 0.747*** |

|                                         |            |            |             |             |           |            |             |             |            |             |             |             |            |             |             |          |
|-----------------------------------------|------------|------------|-------------|-------------|-----------|------------|-------------|-------------|------------|-------------|-------------|-------------|------------|-------------|-------------|----------|
|                                         | -0.066     | -0.035     | -0.031      | -0.031      | -0.260    | -0.116     | -0.046      | -0.048      | -0.072     | -0.029      | -0.103      | -0.026      | -0.322     | -0.082      | -0.072      | -0.054   |
|                                         | 0.485***   | 0.661***   | 0.656***    | 0.602***    | 0.460**   | 0.493***   | 0.994       | 0.561***    | 1.140      | 2.961***    | 1.678***    | 2.544***    | 0.395***   | 1.435***    | 0.492***    | 0.557*** |
| HH members with a private non-wage work |            |            |             |             |           |            |             |             |            |             |             |             |            |             |             |          |
|                                         | -0.067     | -0.035     | -0.047      | -0.032      | -0.140    | -0.053     | -0.067      | -0.024      | -0.102     | -0.097      | -0.189      | -0.079      | -0.115     | -0.094      | -0.081      | -0.043   |
| Children <2                             |            |            |             |             |           |            |             |             |            |             |             |             |            |             |             |          |
|                                         | 0.843      | 0.859***   | 0.797***    | 0.963       | 0.456***  | 0.625***   | 0.352***    | 0.731***    | 0.785***   | 0.930**     | 0.600***    | 0.900***    | 0.860      | 0.964       | 0.718***    | 0.813*** |
|                                         | -0.099     | -0.040     | -0.040      | -0.041      | -0.125    | -0.056     | -0.022      | -0.024      | -0.070     | -0.030      | -0.093      | -0.032      | -0.184     | -0.048      | -0.063      | -0.045   |
| Children between 3 and 5                |            |            |             |             |           |            |             |             |            |             |             |             |            |             |             |          |
|                                         | 0.798**    | 0.852***   | 0.921*      | 0.919**     | 0.398***  | 0.772***   | 0.506***    | 0.842***    | 1.078      | 1.049       | 0.780*      | 1.105***    | 0.644*     | 0.978       | 0.824**     | 0.772*** |
|                                         | -0.091     | -0.034     | -0.044      | -0.038      | -0.115    | -0.060     | -0.031      | -0.028      | -0.092     | -0.031      | -0.112      | -0.037      | -0.150     | -0.049      | -0.075      | -0.047   |
| Children between 6 and 11               |            |            |             |             |           |            |             |             |            |             |             |             |            |             |             |          |
|                                         | 0.802**    | 0.839***   | 0.868***    | 0.994       | 0.815     | 0.980      | 0.562***    | 0.847***    | 1.002      | 1.113***    | 1.082       | 1.114***    | 0.726      | 0.742***    | 0.735***    | 0.650*** |
|                                         | -0.090     | -0.033     | -0.046      | -0.038      | -0.210    | -0.075     | -0.035      | -0.026      | -0.086     | -0.033      | -0.158      | -0.033      | -0.184     | -0.044      | -0.082      | -0.043   |
| Children between 12 and 17              |            |            |             |             |           |            |             |             |            |             |             |             |            |             |             |          |
|                                         | 0.797*     | 0.849***   | 0.770***    | 0.893***    | 0.657     | 0.949      | 0.696***    | 0.826***    | 1.092      | 1.144***    | 0.715**     | 1.035       | 1.150      | 1.049       | 0.934       | 0.911    |
|                                         | -0.095     | -0.036     | -0.044      | -0.039      | -0.192    | -0.081     | -0.048      | -0.031      | -0.093     | -0.034      | -0.099      | -0.031      | -0.334     | -0.084      | -0.146      | -0.077   |
| Children >17                            |            |            |             |             |           |            |             |             |            |             |             |             |            |             |             |          |
|                                         | 1.021      | 0.881***   | 0.848***    | 0.901**     | 1.516     | 1.002      | 0.781***    | 0.931*      | 1.013      | 1.133***    | 0.867       | 1.084***    | 0.821      | 1.065       | 0.966       | 0.875    |
|                                         | -0.121     | -0.037     | -0.048      | -0.040      | -0.412    | -0.086     | -0.055      | -0.034      | -0.087     | -0.034      | -0.121      | -0.033      | -0.267     | -0.086      | -0.153      | -0.076   |
| Constant                                |            |            |             |             |           |            |             |             |            |             |             |             |            |             |             |          |
|                                         | 0.000***   | 0.001***   | 3.11e-06*** | 1.90e-05*** | 0.001***  | 0.004***   | 0.000***    | 0.006***    | 0.002***   | 0.001***    | 3.37e-06*** | 0.001***    | 0.014**    | 2.669**     | 0.064***    | 0.210*** |
|                                         | 0.000      | 0.000      | 0.000       | 0.000       | -0.002    | -0.003     | 0.000       | -0.002      | -0.001     | 0.000       | 0.000       | 0.000       | -0.028     | -1.122      | -0.058      | -0.097   |
| <b>Regional dummies included</b>        | yes        | yes        | yes         | yes         | yes       | yes        | yes         | yes         | yes        | yes         | yes         | yes         | Yes        | Yes         | yes         | yes      |
| <b>Observations</b>                     | <b>607</b> | <b>608</b> | <b>3355</b> | <b>6785</b> | <b>81</b> | <b>928</b> | <b>1644</b> | <b>6267</b> | <b>743</b> | <b>7983</b> | <b>271</b>  | <b>7271</b> | <b>109</b> | <b>2229</b> | <b>1915</b> |          |
|                                         |            |            |             |             |           |            |             |             |            |             | <b>696</b>  |             |            |             |             |          |

**Note:** Standard errors in parentheses; \*\*\*  $p < 0.01$ , \*\*  $p < 0.05$ , \*  $p < 0.1$ .



## Panel C: Never Married Men

|                                                 | Government work |             |             |             | Private Wage Work |             |             |             | Private Non-Wage Work |             |             |             | Unemployment |            |             |             |
|-------------------------------------------------|-----------------|-------------|-------------|-------------|-------------------|-------------|-------------|-------------|-----------------------|-------------|-------------|-------------|--------------|------------|-------------|-------------|
|                                                 | DZ              | EG          | JO          | TN          | DZ                | EG          | JO          | TN          | DZ                    | EG          | JO          | TN          | DZ           | EG         | JO          | TN          |
| Age                                             | 2.632***        | 2.809***    | 3.559***    | 2.674***    | 2.373***          | 2.167***    | 2.832***    | 2.461***    | 2.539***              | 1.936***    | 2.903***    | 2.402***    | 2.182***     | 1.600***   | 2.025***    | 2.210***    |
|                                                 | -0.096          | -0.081      | -0.112      | -0.046      | -0.076            | -0.037      | -0.073      | -0.029      | -0.088                | -0.034      | -0.108      | -0.029      | -0.095       | -0.049     | -0.062      | -0.031      |
| Age squared                                     | 0.254***        | 0.266***    | 0.140***    | 0.282***    | 0.273***          | 0.340***    | 0.208***    | 0.286***    | 0.263***              | 0.419***    | 0.230***    | 0.310***    | 0.302***     | 0.491***   | 0.337***    | 0.322***    |
|                                                 | -0.015          | -0.012      | -0.008      | -0.007      | -0.015            | -0.010      | -0.009      | -0.005      | -0.015                | -0.012      | -0.014      | -0.006      | -0.023       | -0.027     | -0.018      | -0.008      |
| <i>Educational Attainment (ref: university)</i> |                 |             |             |             |                   |             |             |             |                       |             |             |             |              |            |             |             |
| No certificate                                  | 0.189***        | 0.0392***   | 0.0297***   | 0.0221***   | 3.120***          | 0.613***    | 0.259***    | 0.650***    | 3.329***              | 0.792***    | 0.201***    | 0.727***    | 0.499**      | 0.0302***  | 0.0928***   | 0.131***    |
|                                                 | -0.058          | -0.005      | -0.005      | -0.004      | -0.521            | -0.049      | -0.028      | -0.045      | -0.643                | -0.070      | -0.039      | -0.059      | -0.158       | -0.004     | -0.013      | -0.013      |
| Less than secondary certificate                 | 2.390***        | 0.0508***   | 1.030       | 0.771***    | 17.85***          | 0.324***    | 1.558***    | 12.61***    | 16.81***              | 0.337***    | 2.262***    | 16.16***    | 6.685***     | 0.0185***  | 0.678***    | 3.127***    |
|                                                 | -0.199          | -0.006      | -0.078      | -0.046      | -1.591            | -0.026      | -0.119      | -0.528      | -1.849                | -0.030      | -0.255      | -0.856      | -0.634       | -0.002     | -0.055      | -0.132      |
| Secondary certificate                           | 2.622***        | 0.0942***   | 0.143***    | 0.987       | 4.418***          | 0.292***    | 0.197***    | 4.471***    | 6.227***              | 0.346***    | 0.226***    | 6.683***    | 2.146***     | 0.0900***  | 0.0679***   | 1.533***    |
|                                                 | -0.224          | -0.008      | -0.011      | -0.040      | -0.429            | -0.021      | -0.015      | -0.156      | -0.730                | -0.028      | -0.028      | -0.318      | -0.233       | -0.007     | -0.006      | -0.051      |
| Constant                                        | 5.08e-08***     | 6.70e-08*** | 2.11e-08*** | 1.91e-08*** | 3.15e-07***       | 2.28e-05*** | 2.32e-07*** | 1.51e-07*** | 3.24e-08***           | 2.23e-05*** | 1.11e-08*** | 5.25e-08*** | 1.10e-06***  | 0.00432*** | 4.59e-05*** | 2.03e-06*** |
|                                                 | 0.000           | 0.000       | 0.000       | 0.000       | 0.000             | 0.000       | 0.000       | 0.000       | 0.000                 | 0.000       | 0.000       | 0.000       | 0.000        | -0.002     | 0.000       | 0.000       |

|                                 |       |       |       |       |       |        |       |        |       |       |       |        |       |       |       |        |
|---------------------------------|-------|-------|-------|-------|-------|--------|-------|--------|-------|-------|-------|--------|-------|-------|-------|--------|
| Regional<br>dummies<br>included | yes   | yes   | yes   | yes   | yes   | yes    | yes   | yes    | yes   | yes   | yes   | yes    | yes   | yes   | yes   | yes    |
| Observations                    | 1,837 | 1,992 | 6,866 | 4,707 | 3,723 | 12,359 | 7,002 | 19,737 | 2,198 | 6,631 | 1,143 | 11,780 | 1,422 | 3,391 | 3,451 | 11,011 |

**Note:** Standard errors in parentheses; \*\*\* p<0.01, \*\* p<0.05, \* p<0.1.

## Panel D: Currently Married Men

|                                                 | Government work |             |           |             | Private Wage Work |           |          |            | Private Non-Wage Work |            |          |            | Unemployment |            |          |            |
|-------------------------------------------------|-----------------|-------------|-----------|-------------|-------------------|-----------|----------|------------|-----------------------|------------|----------|------------|--------------|------------|----------|------------|
|                                                 | DZ              | EG          | JO        | TN          | DZ                | EG        | JO       | TN         | DZ                    | EG         | JO       | TN         | DZ           | EG         | JO       | TN         |
| Age                                             | 1.687***        | 1.802***    | 0.952**   | 2.078***    | 1.375***          | 1.501***  | 0.974    | 1.685***   | 1.394***              | 1.512***   | 0.999    | 1.656***   | 1.363***     | 1.543***   | 0.902*** | 1.420***   |
|                                                 | -0.078          | -0.038      | -0.021    | -0.040      | -0.064            | -0.031    | -0.021   | -0.028     | -0.063                | -0.031     | -0.023   | -0.028     | -0.110       | -0.072     | -0.028   | -0.036     |
| Age squared                                     | 0.505***        | 0.491***    | 0.878***  | 0.407***    | 0.591***          | 0.538***  | 0.884*** | 0.482***   | 0.608***              | 0.562***   | 0.907*** | 0.507***   | 0.617***     | 0.544***   | 0.983    | 0.587***   |
|                                                 | -0.026          | -0.012      | -0.022    | -0.009      | -0.030            | -0.013    | -0.021   | -0.009     | -0.030                | -0.013     | -0.024   | -0.010     | -0.058       | -0.031     | -0.037   | -0.017     |
| <i>Educational Attainment (ref: university)</i> |                 |             |           |             |                   |           |          |            |                       |            |          |            |              |            |          |            |
| No certificate                                  | 0.191***        | 0.0920***   | 0.0853*** | 0.0296***   | 2.248***          | 1.243**   | 0.607*** | 1.107      | 1.370*                | 1.365***   | 0.514*** | 0.751***   | 0.675        | 0.161***   | 0.576*** | 1.183      |
|                                                 | -0.034          | -0.008      | -0.008    | -0.003      | -0.456            | -0.114    | -0.048   | -0.091     | -0.262                | -0.125     | -0.047   | -0.063     | -0.262       | -0.027     | -0.085   | -0.162     |
| Less than secondary certificate                 | 0.255***        | 0.119***    | 0.185***  | 0.0805***   | 1.388*            | 0.604***  | 0.597*** | 1.521***   | 1.041                 | 0.587***   | 0.742*** | 1.275***   | 0.994        | 0.121***   | 0.786**  | 1.532***   |
|                                                 | -0.042          | -0.012      | -0.011    | -0.006      | -0.264            | -0.060    | -0.037   | -0.115     | -0.187                | -0.058     | -0.051   | -0.098     | -0.332       | -0.025     | -0.086   | -0.191     |
| Secondary certificate                           | 0.584***        | 0.357***    | 0.310***  | 0.187***    | 1.179             | 0.813**   | 0.799*** | 0.702***   | 1.112                 | 0.698***   | 0.865*   | 0.804***   | 0.952        | 0.379***   | 0.720*** | 0.689***   |
|                                                 | -0.107          | -0.032      | -0.021    | -0.013      | -0.247            | -0.075    | -0.054   | -0.053     | -0.220                | -0.065     | -0.065   | -0.062     | -0.347       | -0.052     | -0.087   | -0.088     |
| Constant                                        | 0.00132***      | 0.000167*** | 797.5***  | 2.43e-05*** | 0.0754**          | 0.0397*** | 84.06*** | 0.00189*** | 0.0393***             | 0.00742*** | 11.36*** | 0.00105*** | 0.00432***   | 0.00158*** | 37.61*** | 0.00481*** |

|                                  |              |               |               |               |              |               |               |               |              |               |              |               |            |            |              |              |
|----------------------------------|--------------|---------------|---------------|---------------|--------------|---------------|---------------|---------------|--------------|---------------|--------------|---------------|------------|------------|--------------|--------------|
|                                  | -0.001       | 0.000         | -375.600      | 0.000         | -0.078       | -0.017        | -38.640       | -0.001        | -0.040       | -0.003        | -5.646       | 0.000         | -0.008     | -0.001     | -24.440      | -0.003       |
| <b>Regional dummies included</b> | yes          | yes           | yes           | yes           | yes          | yes           | yes           | yes           | yes          | yes           | yes          | yes           | yes        | yes        | yes          | yes          |
| <b>Observations</b>              | <b>3,934</b> | <b>16,507</b> | <b>11,051</b> | <b>17,765</b> | <b>2,812</b> | <b>20,038</b> | <b>12,597</b> | <b>30,695</b> | <b>3,533</b> | <b>18,745</b> | <b>5,707</b> | <b>24,133</b> | <b>224</b> | <b>486</b> | <b>1,395</b> | <b>2,342</b> |

**Note:** Standard errors in parentheses; \*\*\* p<0.01, \*\* p<0.05, \* p<0.1.

**Table A.2.** Probit Estimates of the Probability of Being Married by Gender. Year: 2010. Ages 15 to 64

| Variable                                                                    | Algeria   |           | Egypt     |           | Jordan    |           | Tunisia   |           |
|-----------------------------------------------------------------------------|-----------|-----------|-----------|-----------|-----------|-----------|-----------|-----------|
|                                                                             | Females   | Males     | Females   | Males     | Females   | Males     | Females   | Males     |
| Age                                                                         | 0.213***  | 0.428***  | 0.386***  | 0.519***  | 0.281***  | 0.491***  | 0.280***  | 0.414***  |
|                                                                             | -0.007    | -0.012    | -0.004    | -0.005    | -0.004    | -0.006    | -0.003    | -0.004    |
| Age squared                                                                 | -0.176*** | -0.377*** | -0.426*** | -0.533*** | -0.291*** | -0.486*** | -0.262*** | -0.370*** |
|                                                                             | -0.010    | -0.015    | -0.006    | -0.007    | -0.006    | -0.009    | -0.004    | -0.006    |
| <i>Educational Attainment (ref: university)</i>                             |           |           |           |           |           |           |           |           |
| No certificate                                                              | 0.674***  | 0.402***  | 0.718***  | 0.515***  | 0.144***  | 0.217***  | 0.373***  | 0.148***  |
|                                                                             | -0.039    | -0.062    | -0.020    | -0.020    | -0.027    | -0.036    | -0.015    | -0.023    |
| Less than secondary certificate                                             | 0.621***  | 0.215***  | 0.610***  | 0.409***  | 0.387***  | 0.485***  | 0.408***  | 0.236***  |
|                                                                             | -0.031    | -0.040    | -0.024    | -0.024    | -0.018    | -0.021    | -0.013    | -0.015    |
| Secondary certificate                                                       | 0.565***  | 0.218***  | 0.430***  | 0.269***  | 0.0320*   | 0.245***  | 0.392***  | 0.140***  |
|                                                                             | -0.034    | -0.044    | -0.018    | -0.018    | -0.018    | -0.023    | -0.012    | -0.015    |
| Proportion married in the individual's province of residence by age18       | -1.233    | 4.350*    | 0.734***  | 0.343***  | 0.037     | 1.292     | 1.397     | 3.493     |
|                                                                             | -1.832    | -2.303    | -0.123    | -0.125    | -0.827    | -0.981    | -2.614    | -3.271    |
| Proportion married in the individual's province of residence by age19 to 21 | 0.389**   | 1.230***  | 0.485***  | 0.182     | 0.440     | -0.459    | 0.622**   | -0.673**  |
|                                                                             | -0.196    | -0.241    | -0.136    | -0.146    | -0.378    | -0.438    | -0.255    | -0.308    |

|                                                                                   |           |           |           |           |           |           |           |           |
|-----------------------------------------------------------------------------------|-----------|-----------|-----------|-----------|-----------|-----------|-----------|-----------|
| Proportion married in the individual's province of residence by age 22 to 24      | 0.421***  | 0.266**   | 0.443***  | 1.068***  | 0.359     | 1.238***  | 0.188     | 1.304***  |
|                                                                                   | -0.110    | -0.135    | -0.161    | -0.173    | -0.226    | -0.271    | -0.122    | -0.151    |
| Proportion married in the individual's province of residence by age 25 to 27      | 0.455***  | 0.482***  | 0.638***  | 0.270     | 0.217     | -0.050    | 0.193     | 0.258     |
|                                                                                   | -0.107    | -0.131    | -0.179    | -0.193    | -0.229    | -0.280    | -0.132    | -0.163    |
| Proportion married in the individual's province of residence by age 28 to 30      | 0.248**   | 0.560***  | 0.590***  | 0.404*    | 0.383*    | 0.561**   | 0.549***  | 0.684***  |
|                                                                                   | -0.110    | -0.136    | -0.220    | -0.237    | -0.213    | -0.260    | -0.161    | -0.204    |
| Proportion married in the individual's province of residence by age 31 to 35      | 0.542***  | 0.270*    | 0.356     | -0.097    | 0.677*    | 0.269     | 0.807***  | -1.159*** |
|                                                                                   | -0.130    | -0.159    | -0.325    | -0.360    | -0.400    | -0.473    | -0.135    | -0.178    |
| Proportion married in the individual's province of residence by age older than 36 | 2.256***  | 2.220***  | 3.913***  | 0.874     | 1.902**   | 0.047     | 2.549***  | 6.079***  |
|                                                                                   | -0.344    | -0.421    | -0.888    | -0.965    | -0.787    | -0.932    | -0.305    | -0.400    |
| Regional dummies included                                                         | yes       |
| Constant                                                                          | -8.040*** | -13.14*** | -12.54*** | -12.58*** | -8.337*** | -11.50*** | -9.563*** | -15.21*** |
|                                                                                   | -0.319    | -0.427    | -0.828    | -0.887    | -0.509    | -0.615    | -0.265    | -0.349    |
| Observations                                                                      | 24,307    | 24,574    | 93,048    | 93,133    | 61,004    | 63,375    | 166,623   | 150,096   |

**Note: i.** Standard errors in parentheses \*\*\* p<0.01, \*\* p<0.05, \* p<0.1.

**ii.** We use these equations to predict propensity scores for being married. We use these propensity scores to create weights to apply to our multinomial logit models.

**Table A.3.** T-statistic for a test of whether differences in probabilities across last and first year, last and middle year, and middle and first year are statistically significant

**Panel A: Women**

|                     |                       | Algeria       |                   | Egypt         |                   | Jordan        |                   | Tunisia       |                   |         |
|---------------------|-----------------------|---------------|-------------------|---------------|-------------------|---------------|-------------------|---------------|-------------------|---------|
|                     |                       | Never Married | Currently Married |         |
| Last - First Years  | Government work       | -1.924        | *                 | -1.274        | -13.118           | -4.764        | -6.040            | -13.009       | -11.115           | -10.957 |
|                     | Private Non-Wage Work | 2.574         | **                | 1.149         | -1.465            | -3.657        | -3.235            | -1.348        | 2.157             | -1.521  |
|                     | Private Wage Work     | 1.403         |                   | 1.019         | 3.801             | -0.053        | 2.460             | 8.206         | 2.246             | -0.008  |
|                     | Unemployment          | 0.086         |                   | -1.115        | 4.532             | 6.821         | 4.935             | 3.915         | 19.023            | 10.905  |
|                     | Inactivity            | 1.723         | *                 | 1.426         | 8.946             | 0.254         | 0.623             | 4.026         | -6.876            | -0.568  |
| Last - Middle Years | Government work       | 0.930         |                   | -1.021        | -7.692            | -5.417        | -2.860            | -9.682        | -10.465           | -13.801 |
|                     | Private Non-Wage Work | 1.632         | *                 | 3.691         | 3.551             | 1.187         | -0.849            | -1.572        | -2.007            | -8.499  |

Middle - First Years

|                       |        |  |        |  |        |        |        |       |        |        |     |        |        |        |        |        |        |        |        |        |     |        |       |       |        |     |
|-----------------------|--------|--|--------|--|--------|--------|--------|-------|--------|--------|-----|--------|--------|--------|--------|--------|--------|--------|--------|--------|-----|--------|-------|-------|--------|-----|
| Private Wage Work     | 0.600  |  | 2.992  |  | ***    | -0.527 |        | 0.824 |        | -1.021 |     | 5.410  |        | ***    | -4.359 |        | ***    | -3.105 |        | ***    |     |        |       |       |        |     |
| Unemployment          | -0.154 |  | -2.237 |  | **     | 1.445  |        | 5.689 |        | ***    | **  | 1.587  |        | 15.718 |        | ***    | 15.659 |        | ***    |        |     |        |       |       |        |     |
| Inactivity            | -1.465 |  | 0.262  |  |        | 5.916  |        | ***   |        | -0.196 |     | 1.019  |        | 2.956  |        | ***    | -5.909 |        | ***    | -3.159 |     | ***    |       |       |        |     |
| <hr/>                 |        |  |        |  |        |        |        |       |        |        |     |        |        |        |        |        |        |        |        |        |     |        |       |       |        |     |
| Government work       | -2.586 |  | **     |  | -0.483 |        | -7.685 |       | ***    | 0.179  |     | -4.049 |        | ***    |        | -4.852 |        | ***    | -4.243 |        | *** | -1.749 |       | *     |        |     |
| Private Non-Wage Work | 1.506  |  |        |  | -1.686 |        | *      |       | -3.010 |        | *** |        | -3.967 |        | ***    |        | ***    |        | ***    | -0.030 |     | 3.790  |       | 6.092 |        | *** |
| Private Wage Work     | 0.836  |  |        |  | -1.055 |        |        | 4.010 |        | ***    |     | -0.706 |        | 3.427  |        | ***    |        | ***    | 5.743  |        | *** | 2.459  |       | **    |        |     |
| Unemployment          | 0.227  |  |        |  | 0.790  |        |        | 3.356 |        | ***    |     | 1.732  |        | *      |        | 3.226  |        | ***    | 2.816  |        | *** | 5.808  |       | ***   | -1.116 |     |
| Inactivity            | 2.907  |  | ***    |  | 1.168  |        |        | 3.809 |        | ***    |     | 0.401  |        |        |        | -0.183 |        | 1.605  |        | -2.728 |     | ***    | 1.961 |       | *      |     |

**Note:** Significant at 10% (\*), 5% (\*\*), and 1% (\*\*\*)



## Panel B: Men

|                     |                       | Algeria       |                   | Egypt          |                   | Jordan        |                   | Tunisia       |                   |
|---------------------|-----------------------|---------------|-------------------|----------------|-------------------|---------------|-------------------|---------------|-------------------|
|                     |                       | Never Married | Currently Married | Never Married  | Currently Married | Never Married | Currently Married | Never Married | Currently Married |
| Last - First Years  | Government work       | -1.692<br>*   | -1.104            | -19.098<br>*** | -18.478<br>***    | -0.214        | -0.858            | -8.117<br>*** | -4.205<br>***     |
|                     | Private Non-Wage Work | 5.597<br>***  | 1.711<br>*        | -4.229<br>***  | -2.975<br>***     | -5.248<br>*** | -3.729<br>***     | -2.501<br>**  | 0.958             |
|                     | Private Wage Work     | 6.210<br>***  | 4.079<br>***      | 9.372<br>***   | 11.644<br>***     | 4.220<br>***  | 2.298<br>**       | 2.006<br>**   | 2.081<br>**       |
|                     | Unemployment          | -5.685<br>*** | -5.924<br>***     | 11.132<br>***  | 10.848<br>***     | 5.309<br>***  | 1.220             | 18.328<br>*** | 5.575<br>***      |
|                     | Inactivity            | 0.046         | 1.219             | 2.575<br>**    | 6.455<br>***      | -7.385<br>*** | 1.462             | -9.251<br>*** | -1.115            |
| Last - Middle Years | Government work       | -1.493        | -5.614<br>***     | -9.572<br>***  | -7.032<br>***     | -2.129<br>**  | -2.019<br>**      | -7.099<br>*** | -0.286            |
|                     | Private Non-Wage Work | 0.499         | 2.995<br>***      | -2.085<br>*    | -1.464            | -0.002        | -1.305            | -7.046<br>*** | -4.871<br>***     |
|                     | Private Wage Work     | 8.419<br>***  | 6.186<br>***      | 2.839<br>***   | 0.405             | -1.319        | 0.211             | -1.806<br>*   | 0.583             |

Middle - First Years

|                       |        |     |        |     |         |     |         |     |        |     |        |     |        |     |        |     |
|-----------------------|--------|-----|--------|-----|---------|-----|---------|-----|--------|-----|--------|-----|--------|-----|--------|-----|
| Unemployment          | -5.056 | *** | -3.927 | *** | 2.919   | *** | 8.729   | *** | 4.423  | *** | 4.128  | *** | 14.524 | *** | 4.569  | *** |
| Inactivity            | -0.160 |     | -0.193 |     | 5.504   | *** | 2.748   | **  | 0.198  |     | 4.065  | *** | -3.209 | *** | 4.618  | *** |
| <hr/>                 |        |     |        |     |         |     |         |     |        |     |        |     |        |     |        |     |
| Government work       | -0.454 |     | 3.455  | *** | -11.959 | *** | -13.033 | *** | 1.611  |     | 0.932  |     | -2.616 | **  | -4.036 | *** |
| Private Non-Wage Work | 5.230  | *** | -0.754 |     | -2.713  | *** | -1.781  |     | -5.316 | *** | -2.780 | *** | 3.059  | *** | 4.819  | *** |
| Private Wage Work     | -1.007 |     | -1.127 |     | 7.059   | *** | 11.322  | *** | 5.555  | *** | 2.215  | **  | 3.576  | *** | 1.654  |     |
| Unemployment          | -1.705 | *   | -3.910 | *** | 8.454   | *** | 2.727   | *** | 1.420  |     | -2.565 | **  | 6.175  | *** | 1.937  | *   |
| Inactivity            | 0.179  |     | 1.352  |     | -1.802  |     | 4.210   | *** | -7.569 | *** | -2.006 | **  | -7.004 | *** | -4.264 | *** |

**Note:** Significant at 10% (\*), 5% (\*\*), and 1% (\*\*\*) .

## Online Appendix B: Sensitivity Analysis

**Figure B.1.** Sensitivity Analysis for the Use of Propensity Score Weights– Five Labor Market States – University-Educated, by Country and Gender

**Panel A:** Algeria (2001-2010)

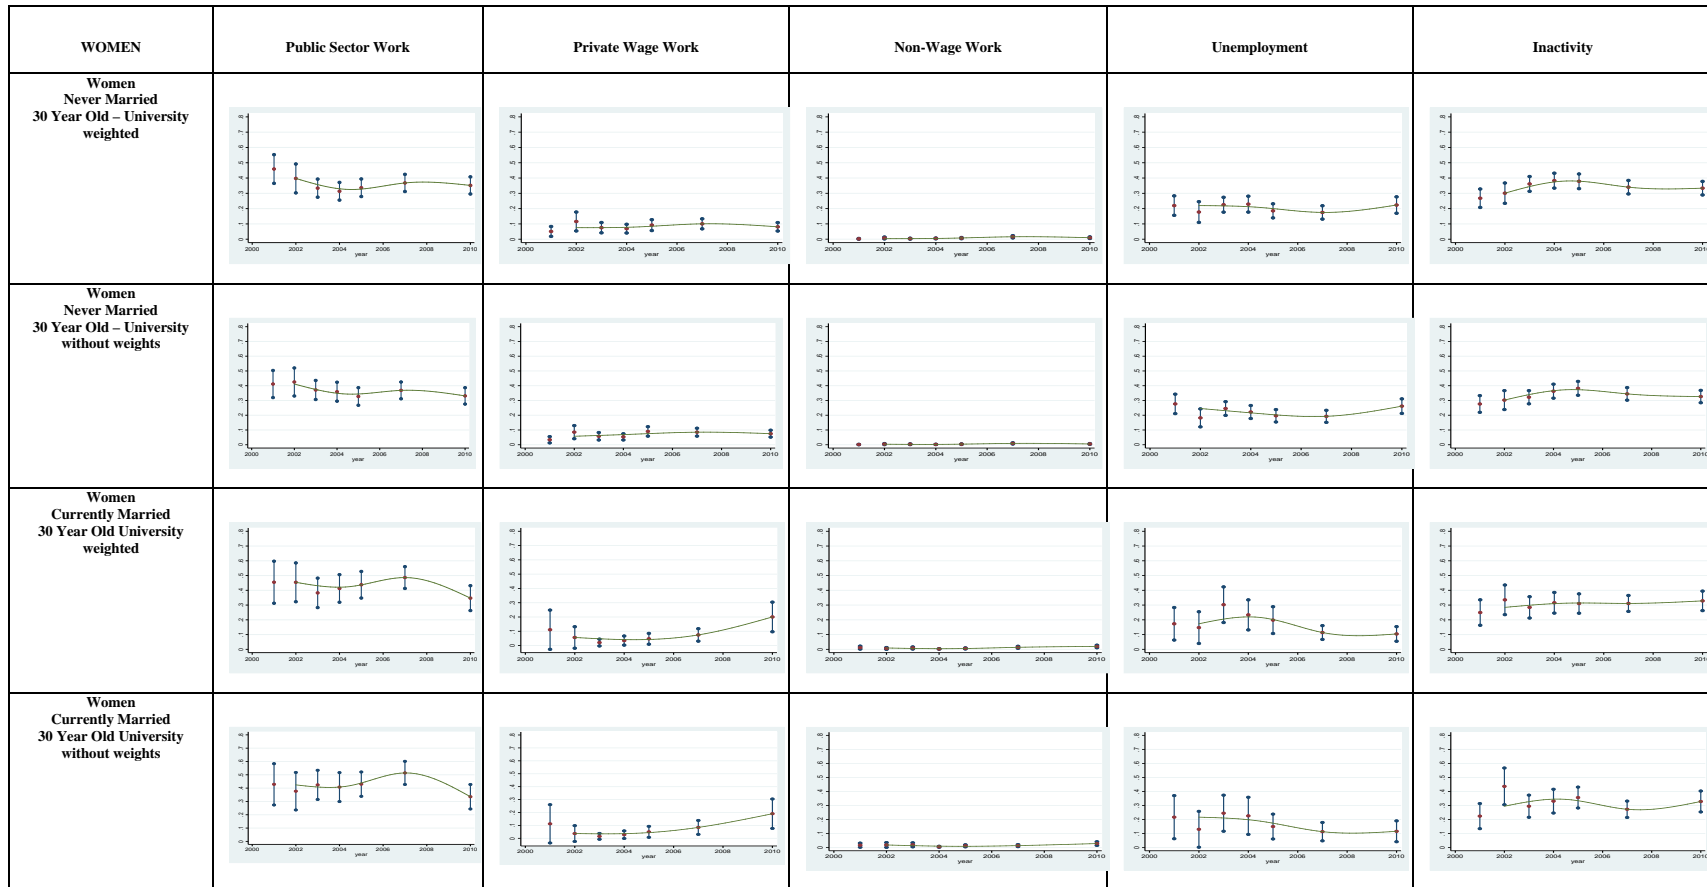

| MEN                                                                   | Public Sector Work | Private Wage Work | Non-Wage Work | Unemployment | Inactivity |
|-----------------------------------------------------------------------|--------------------|-------------------|---------------|--------------|------------|
| Men<br>Never Married<br>30 Year Old University<br>weighted            |                    |                   |               |              |            |
| Men<br>Never Married<br>30 Year Old University<br>without weights     |                    |                   |               |              |            |
| Men<br>Currently Married<br>30 Year Old University<br>weighted        |                    |                   |               |              |            |
| Men<br>Currently Married<br>30 Year Old University<br>without weights |                    |                   |               |              |            |

**Panel B: Egypt (2000-2017)**

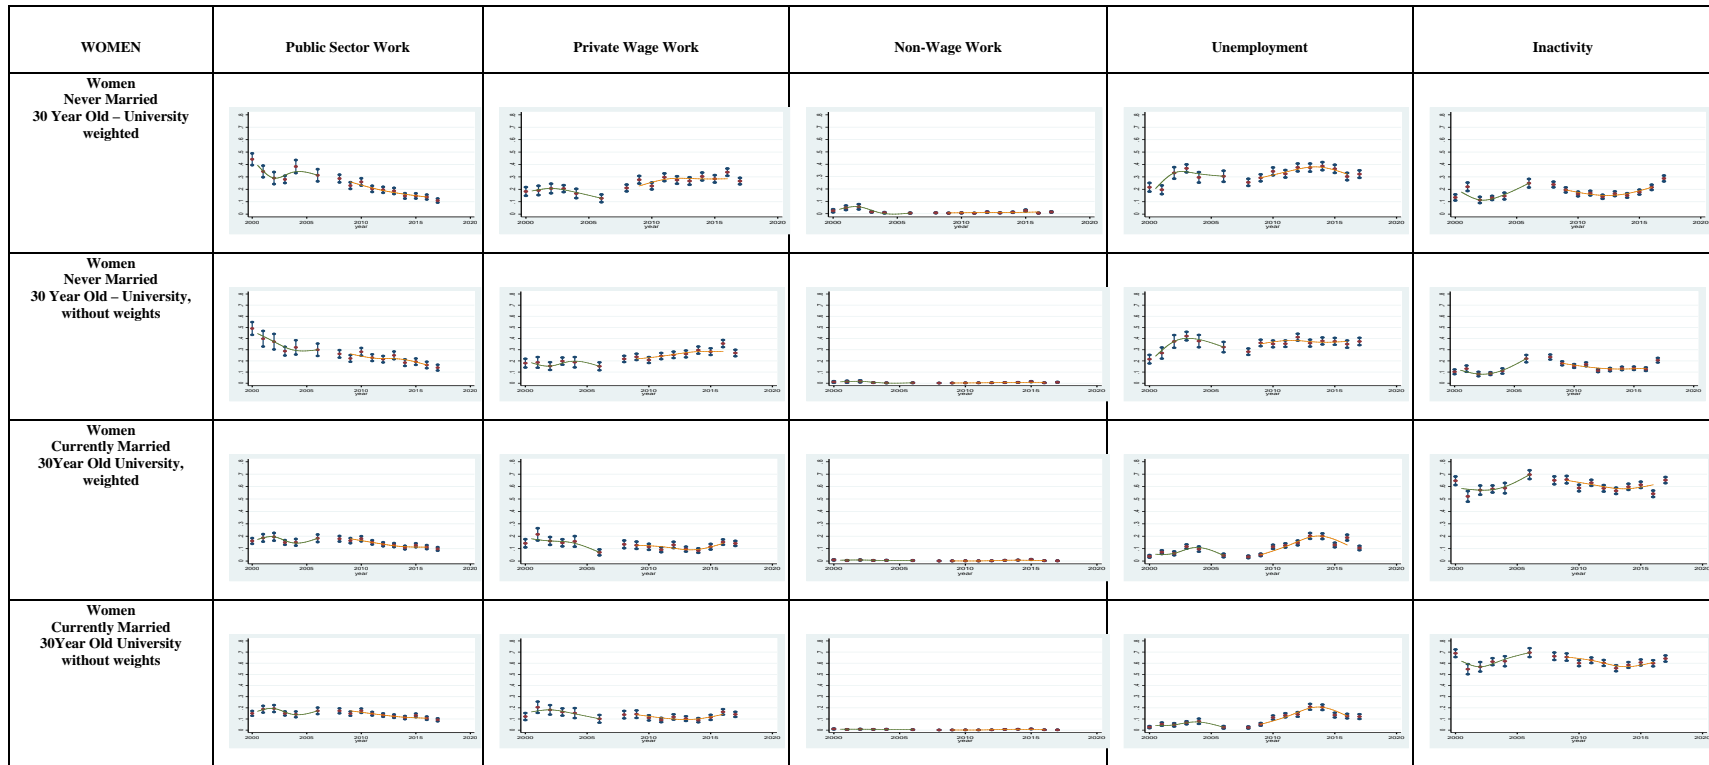

| MEN                                                                    | Public Sector Work | Private Wage Work | Non-Wage Work | Unemployment | Inactivity |
|------------------------------------------------------------------------|--------------------|-------------------|---------------|--------------|------------|
| Men<br>Never Married<br>30 Year Old University,<br>weighted            |                    |                   |               |              |            |
| Men<br>Never Married<br>30 Year Old University<br>without weights      |                    |                   |               |              |            |
| Men<br>Currently Married<br>30 Year Old University,<br>weighted        |                    |                   |               |              |            |
| Men<br>Currently Married<br>30 Year Old University,<br>without weights |                    |                   |               |              |            |

**Panel C: Jordan (2000-2016)**

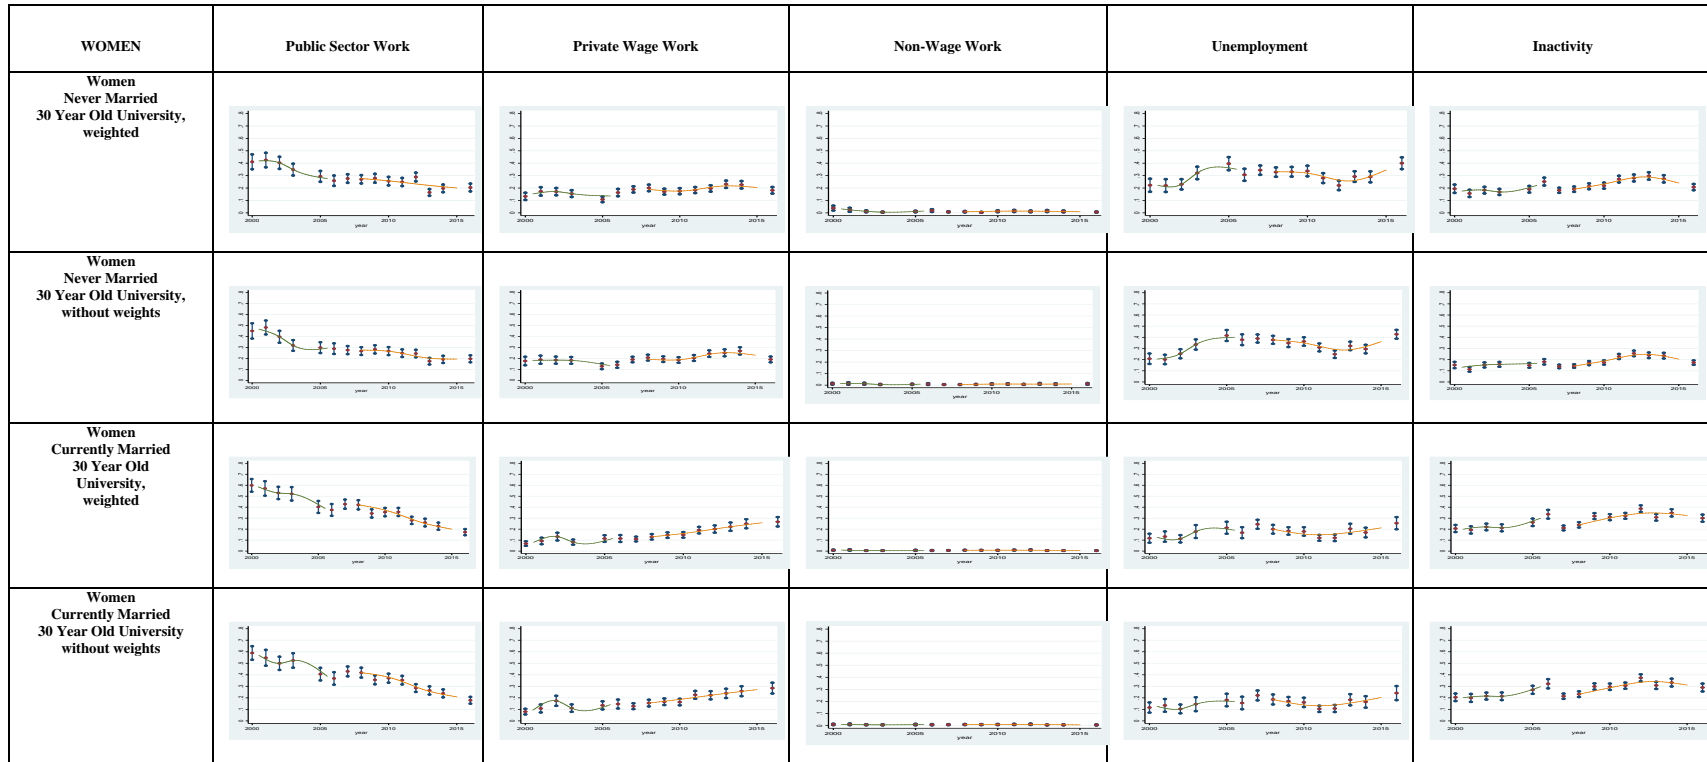

| MEN                                                                    | Public Sector Work | Private Wage Work | Non-Wage Work | Unemployment | Inactivity |
|------------------------------------------------------------------------|--------------------|-------------------|---------------|--------------|------------|
| Men<br>Never Married<br>30 Year Old University,<br>weighted            |                    |                   |               |              |            |
| Men<br>Never Married<br>30 Year Old University,<br>without weights     |                    |                   |               |              |            |
| Men<br>Currently Married<br>30 Year Old University,<br>weighted        |                    |                   |               |              |            |
| Men<br>Currently Married<br>30 Year Old University,<br>without weights |                    |                   |               |              |            |



Panel D: Tunisia (2005-2013)

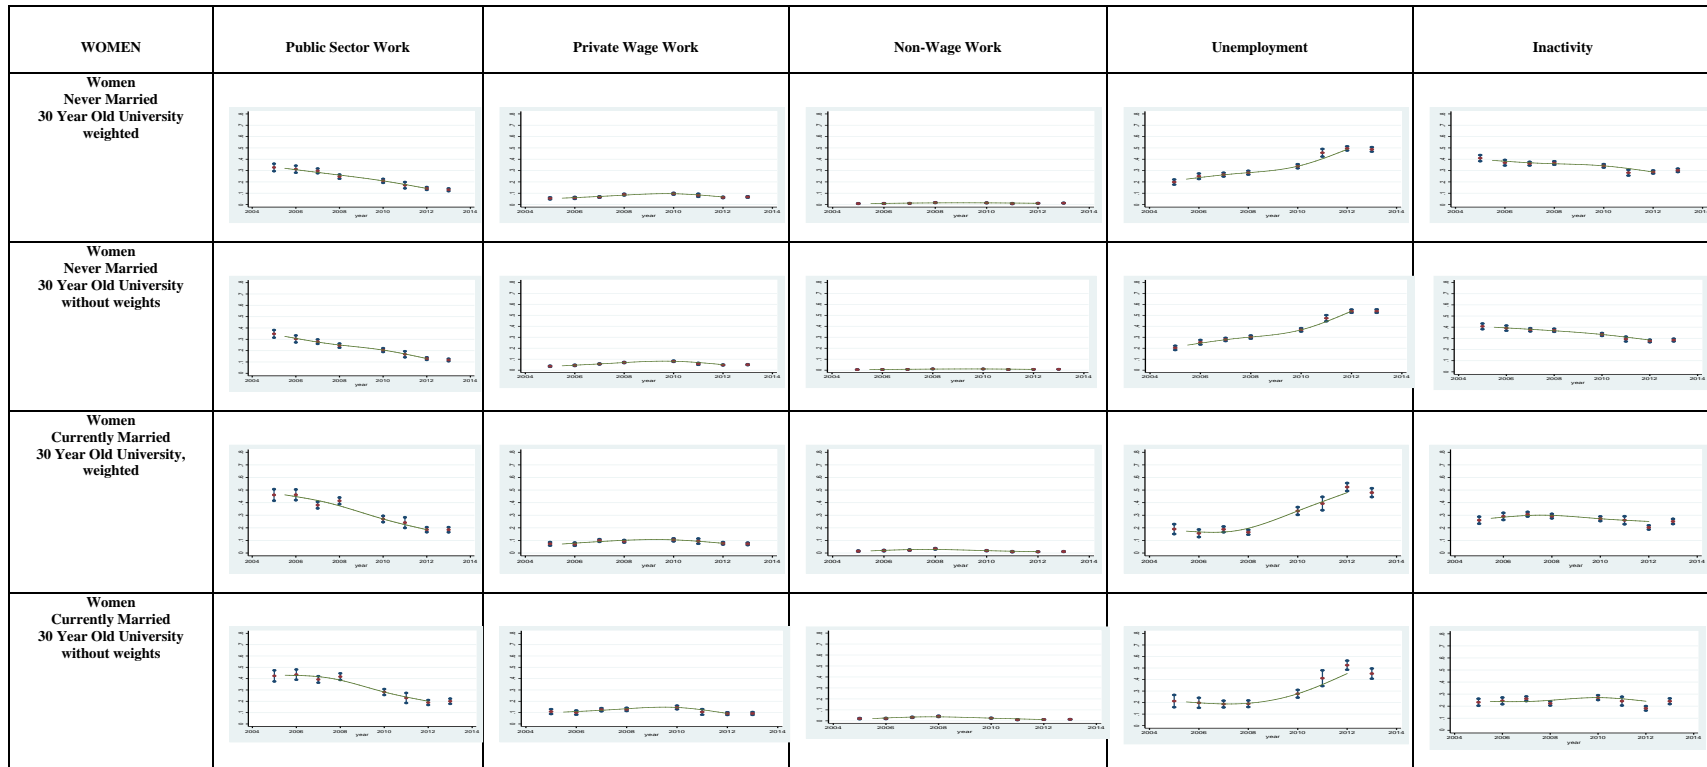

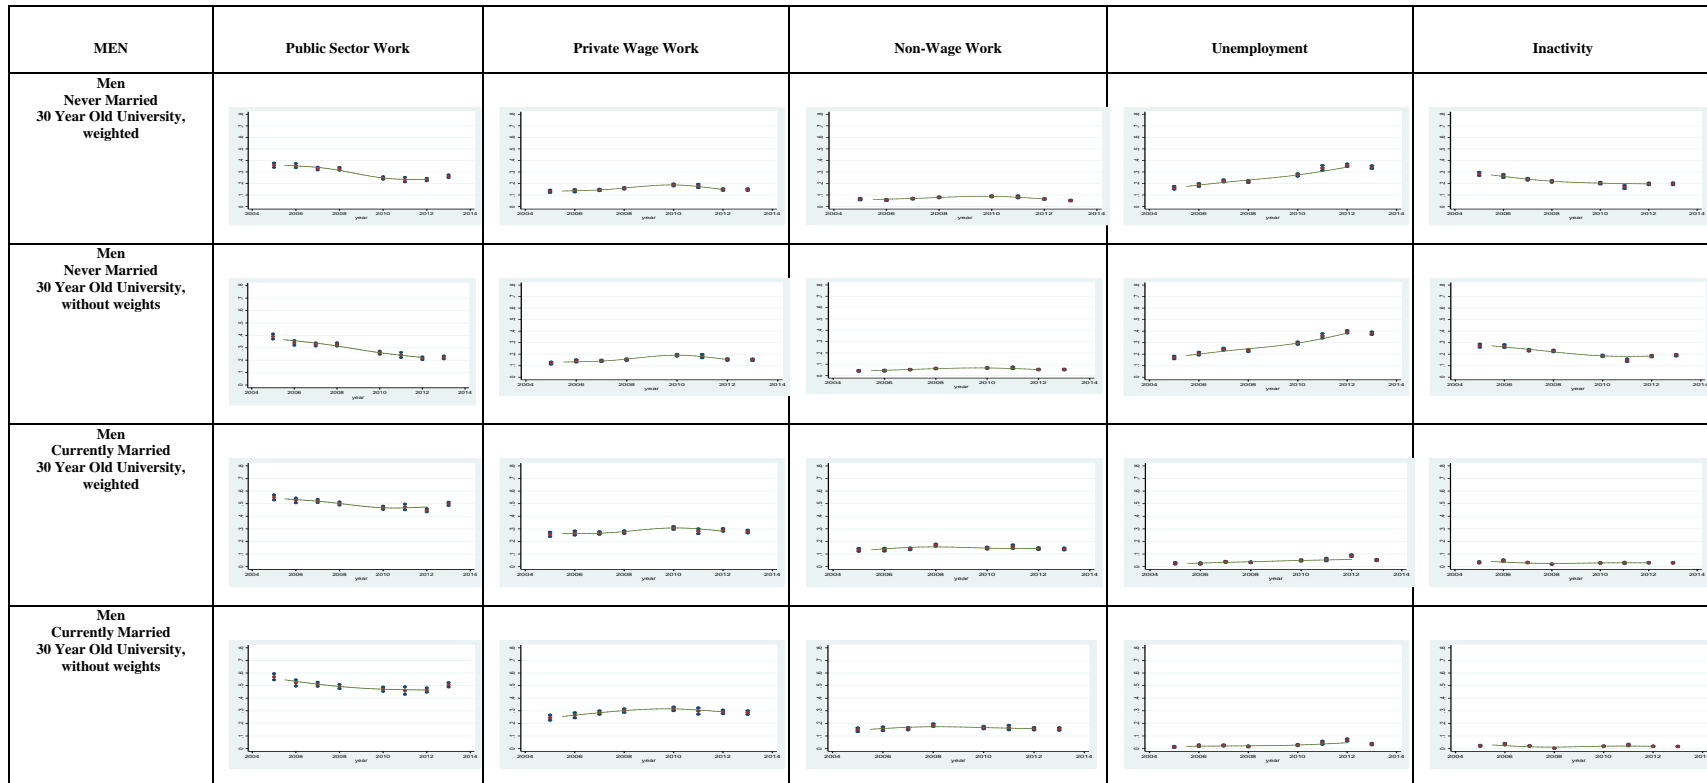

**Source:** Computed by authors based on data from official labor force surveys in each of the four countries. See data section in text for details.

**Note:** Simulations are carried out for a 20, 25 and 30 year old) university-educated female and male residing in an urban area in the region of her country that includes the capital city. Four-period splines are used to smooth fluctuations in the simulation results.

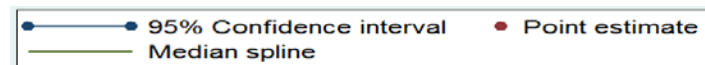

**Figure B.2.** Sensitivity Analysis to Varying Reference Individual Age– Five Labor Market States – University-Educated, by Country and Gender

**Panel A:** Algeria (2001-2010)

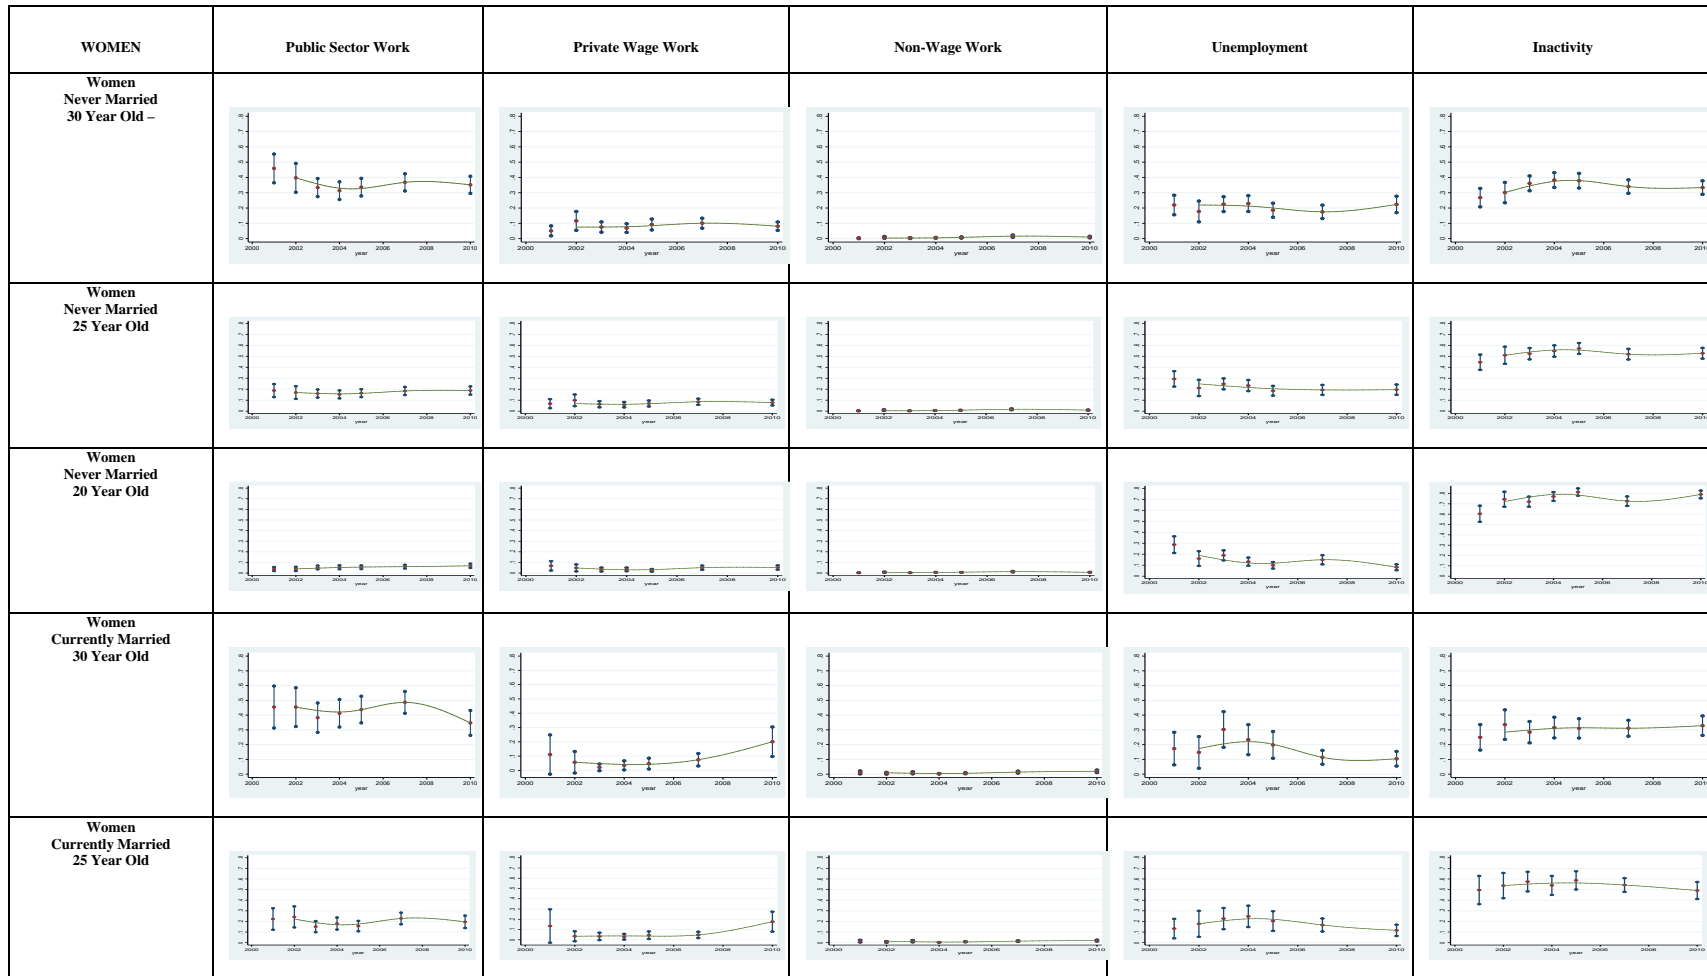

**Women  
Currently Married  
20 Year Old**

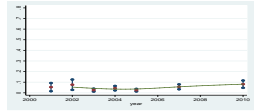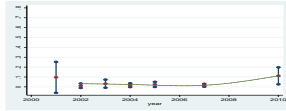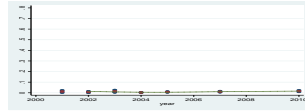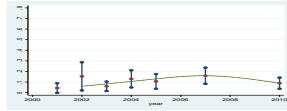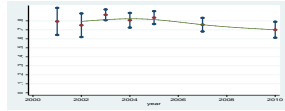

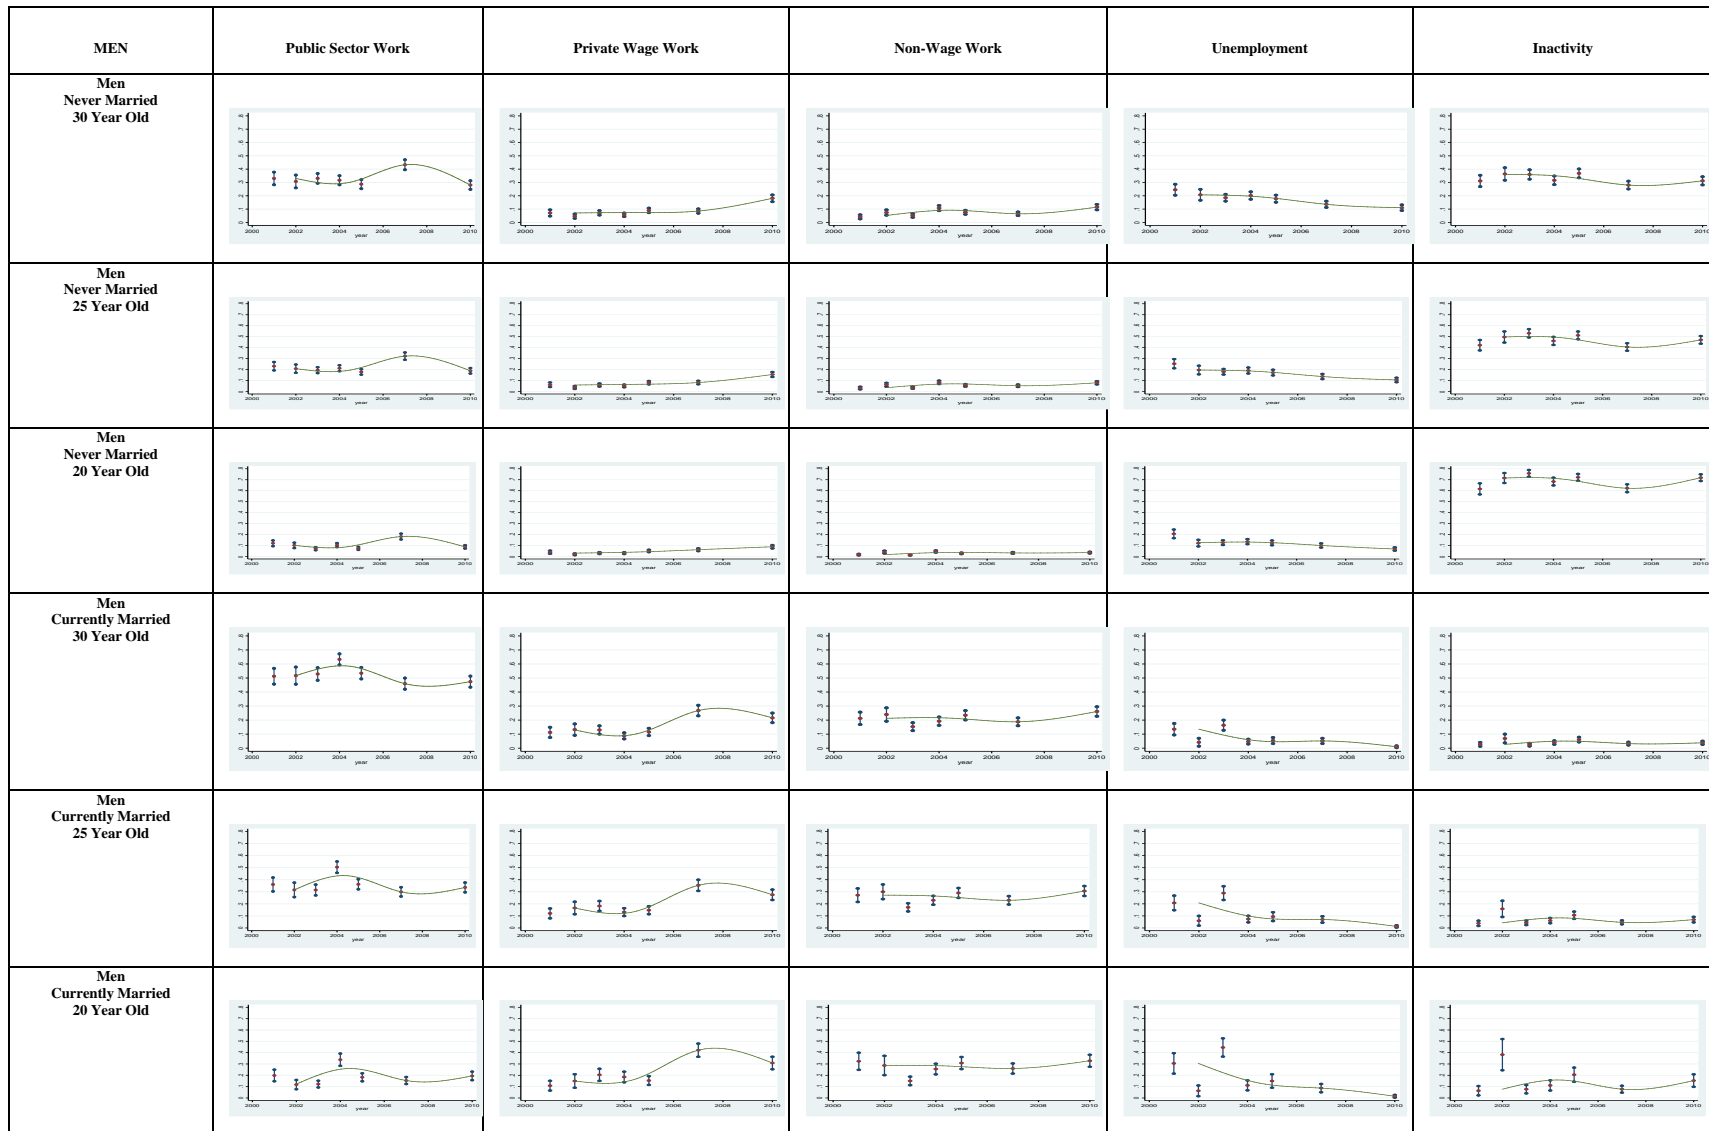



**Panel B: Egypt (2000-2017)**

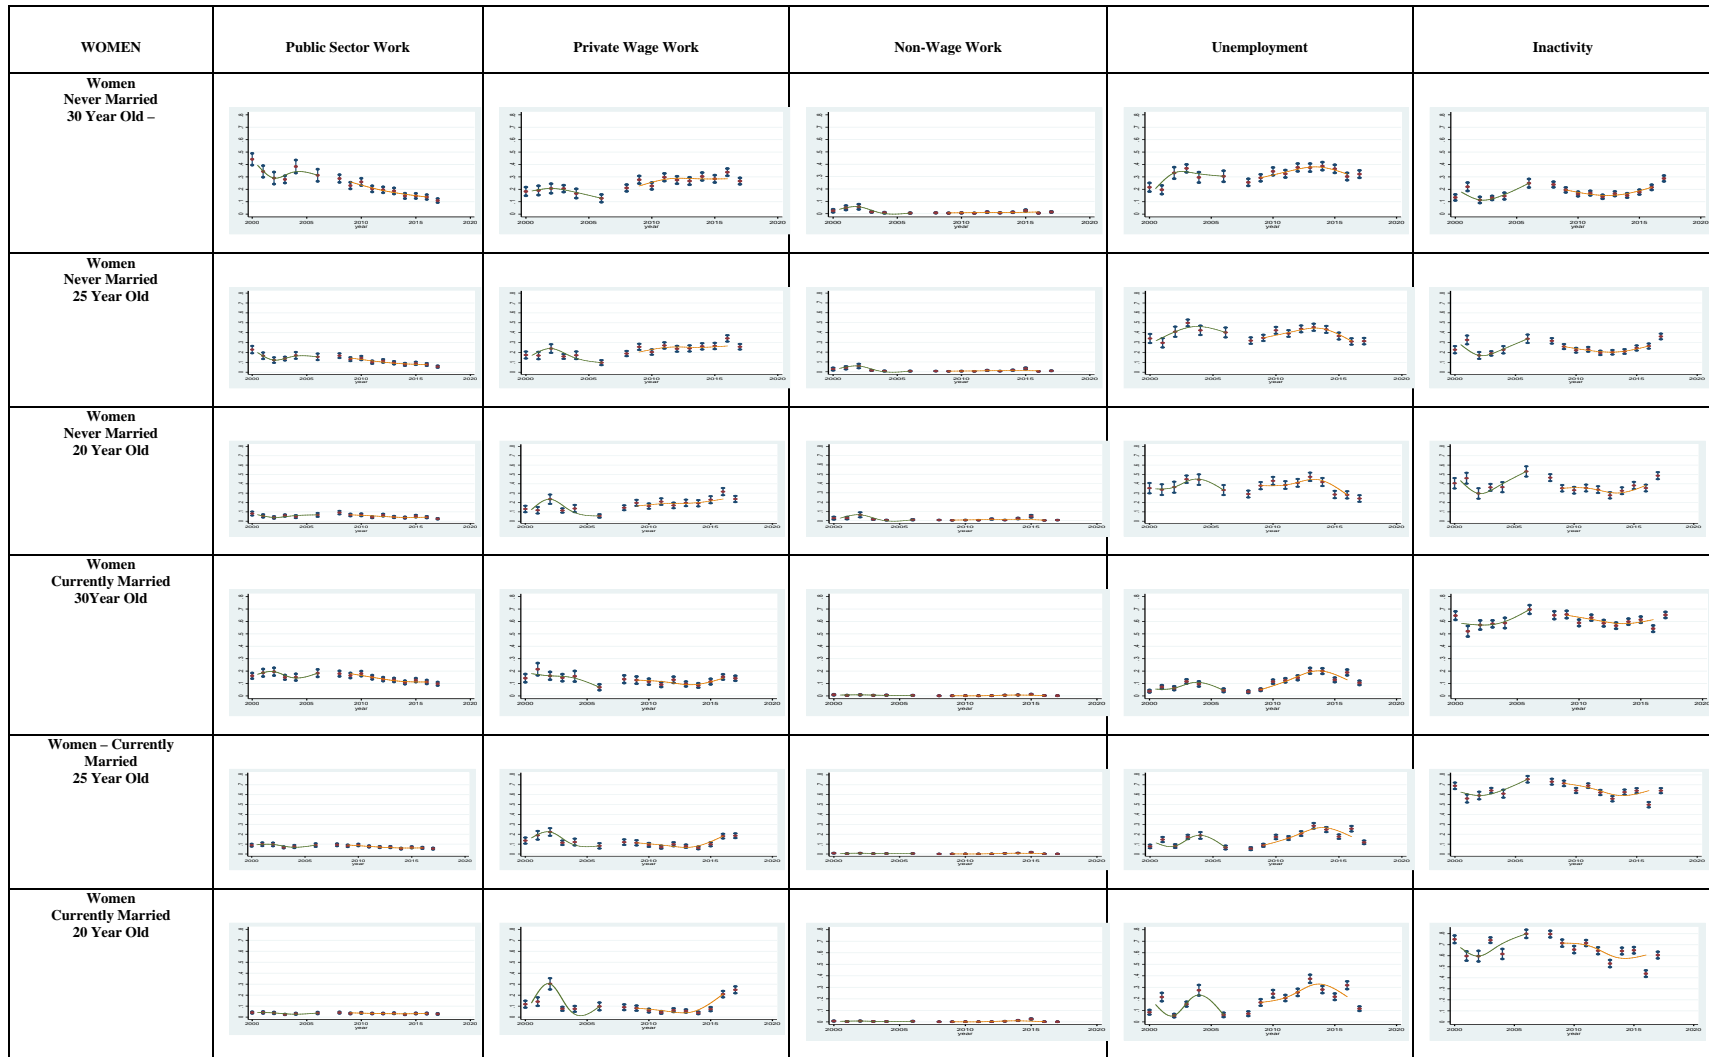

| MEN                                      | Public Sector Work | Private Wage Work | Non-Wage Work | Unemployment | Inactivity |
|------------------------------------------|--------------------|-------------------|---------------|--------------|------------|
| <b>Men Never Married 30 Year Old</b>     |                    |                   |               |              |            |
| <b>Men Never Married 25 Year Old</b>     |                    |                   |               |              |            |
| <b>Men Never Married 20 Year Old</b>     |                    |                   |               |              |            |
| <b>Men Currently Married 30 Year Old</b> |                    |                   |               |              |            |
| <b>Men Currently Married 25 Year Old</b> |                    |                   |               |              |            |
| <b>Men Currently Married 20 Year Old</b> |                    |                   |               |              |            |



**Panel C: Jordan (2000-2016)**

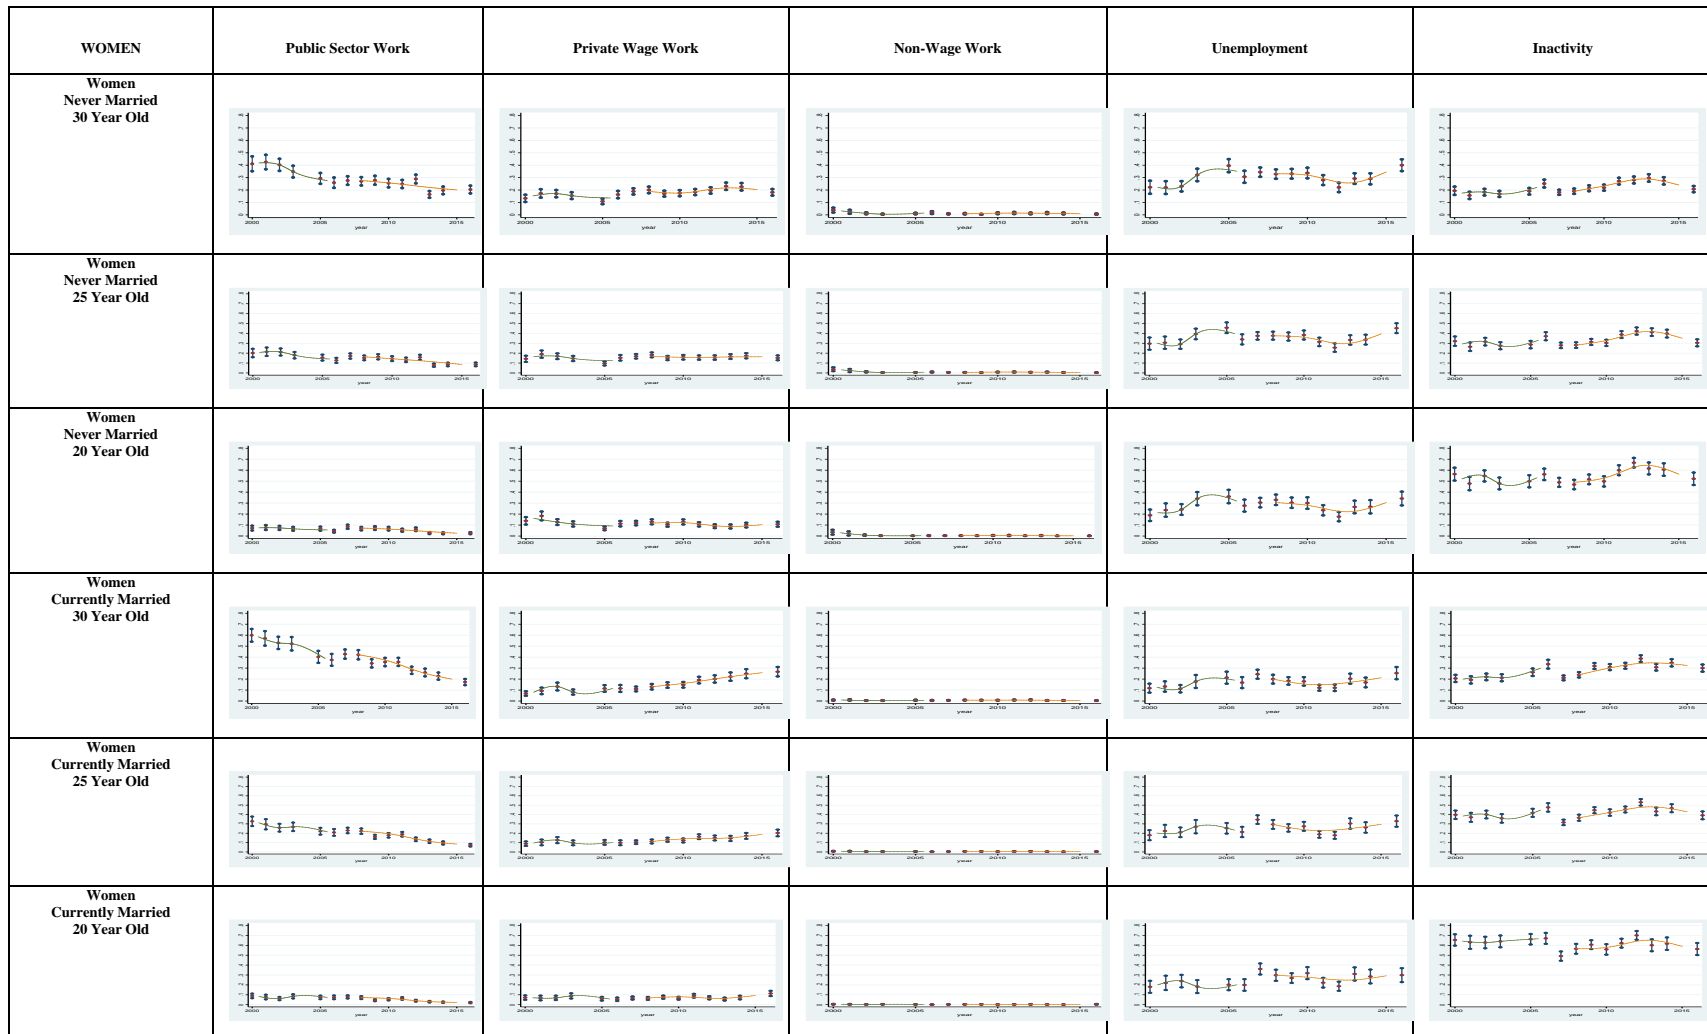

| MEN                               | Public Sector Work | Private Wage Work | Non-Wage Work | Unemployment | Inactivity |
|-----------------------------------|--------------------|-------------------|---------------|--------------|------------|
| Men Never Married 30 Year Old     |                    |                   |               |              |            |
| Men Never Married 25 Year Old     |                    |                   |               |              |            |
| Men Never Married 20 Year Old     |                    |                   |               |              |            |
| Men Currently Married 30 Year Old |                    |                   |               |              |            |
| Men Currently Married 25 Year Old |                    |                   |               |              |            |
| Men Currently Married 20 Year Old |                    |                   |               |              |            |

**Panel D: Tunisia (2005-2013)**

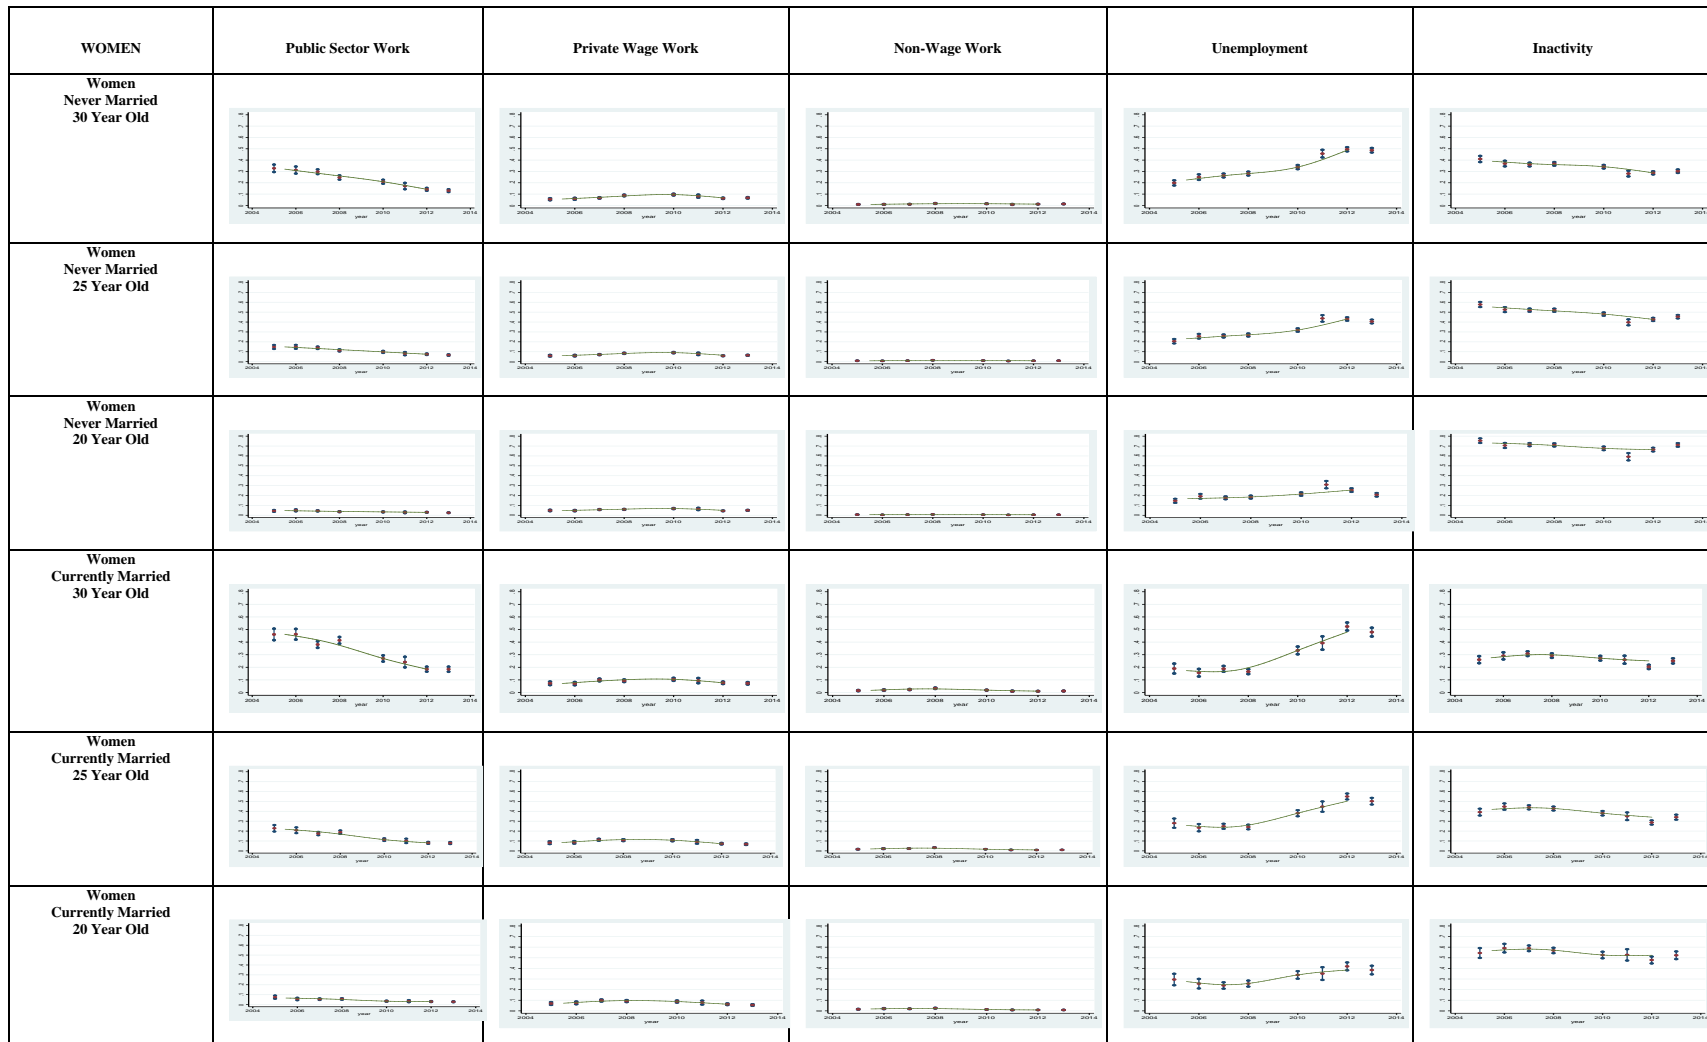

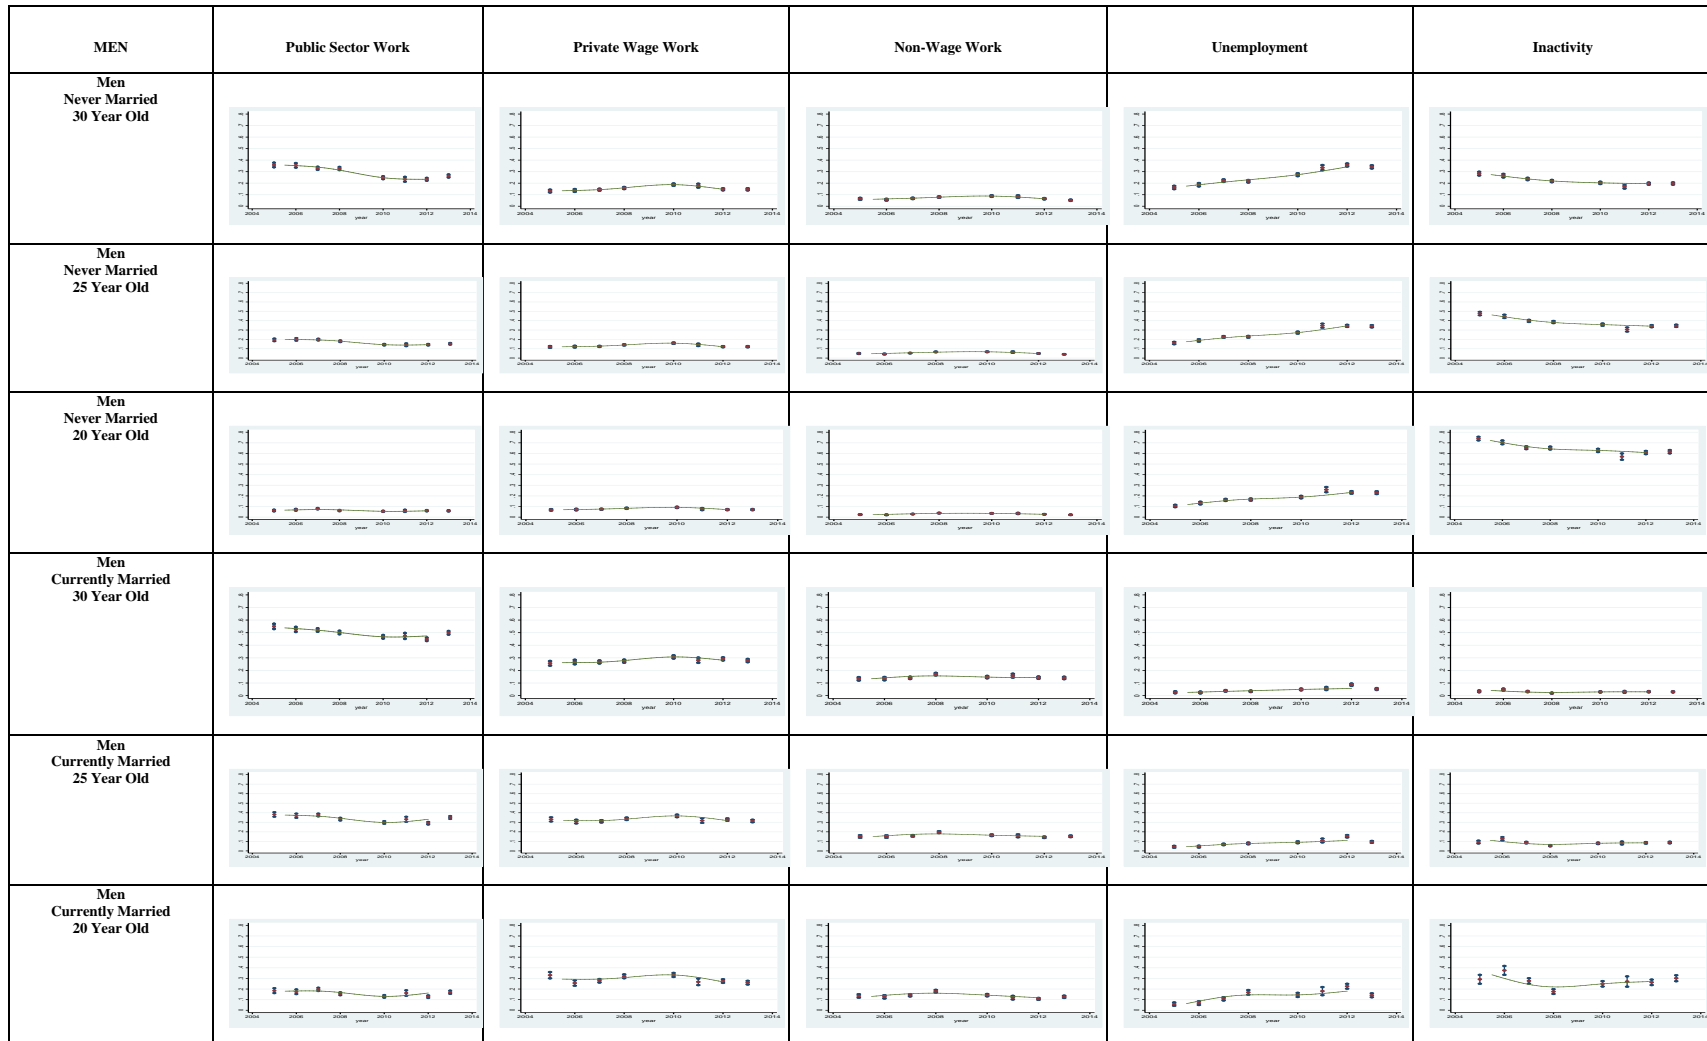

**Source:** Computed by authors based on data from official labor force surveys in each of the four countries. See data section in text for details.

**Note:** Simulations are carried out for a 20, 25 and 30 year old) university-educated female and male residing in an urban area in the region of her country that includes the capital city. Four-period splines are used to smooth fluctuations in the simulation results.

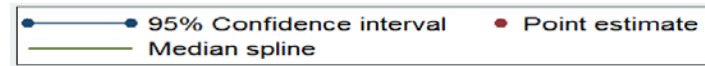

**Figure B.3.** Sensitivity Analysis to Varying Reference Individual Education from University to Secondary by Country and Gender

**Panel A: Algeria (2001-2010)**

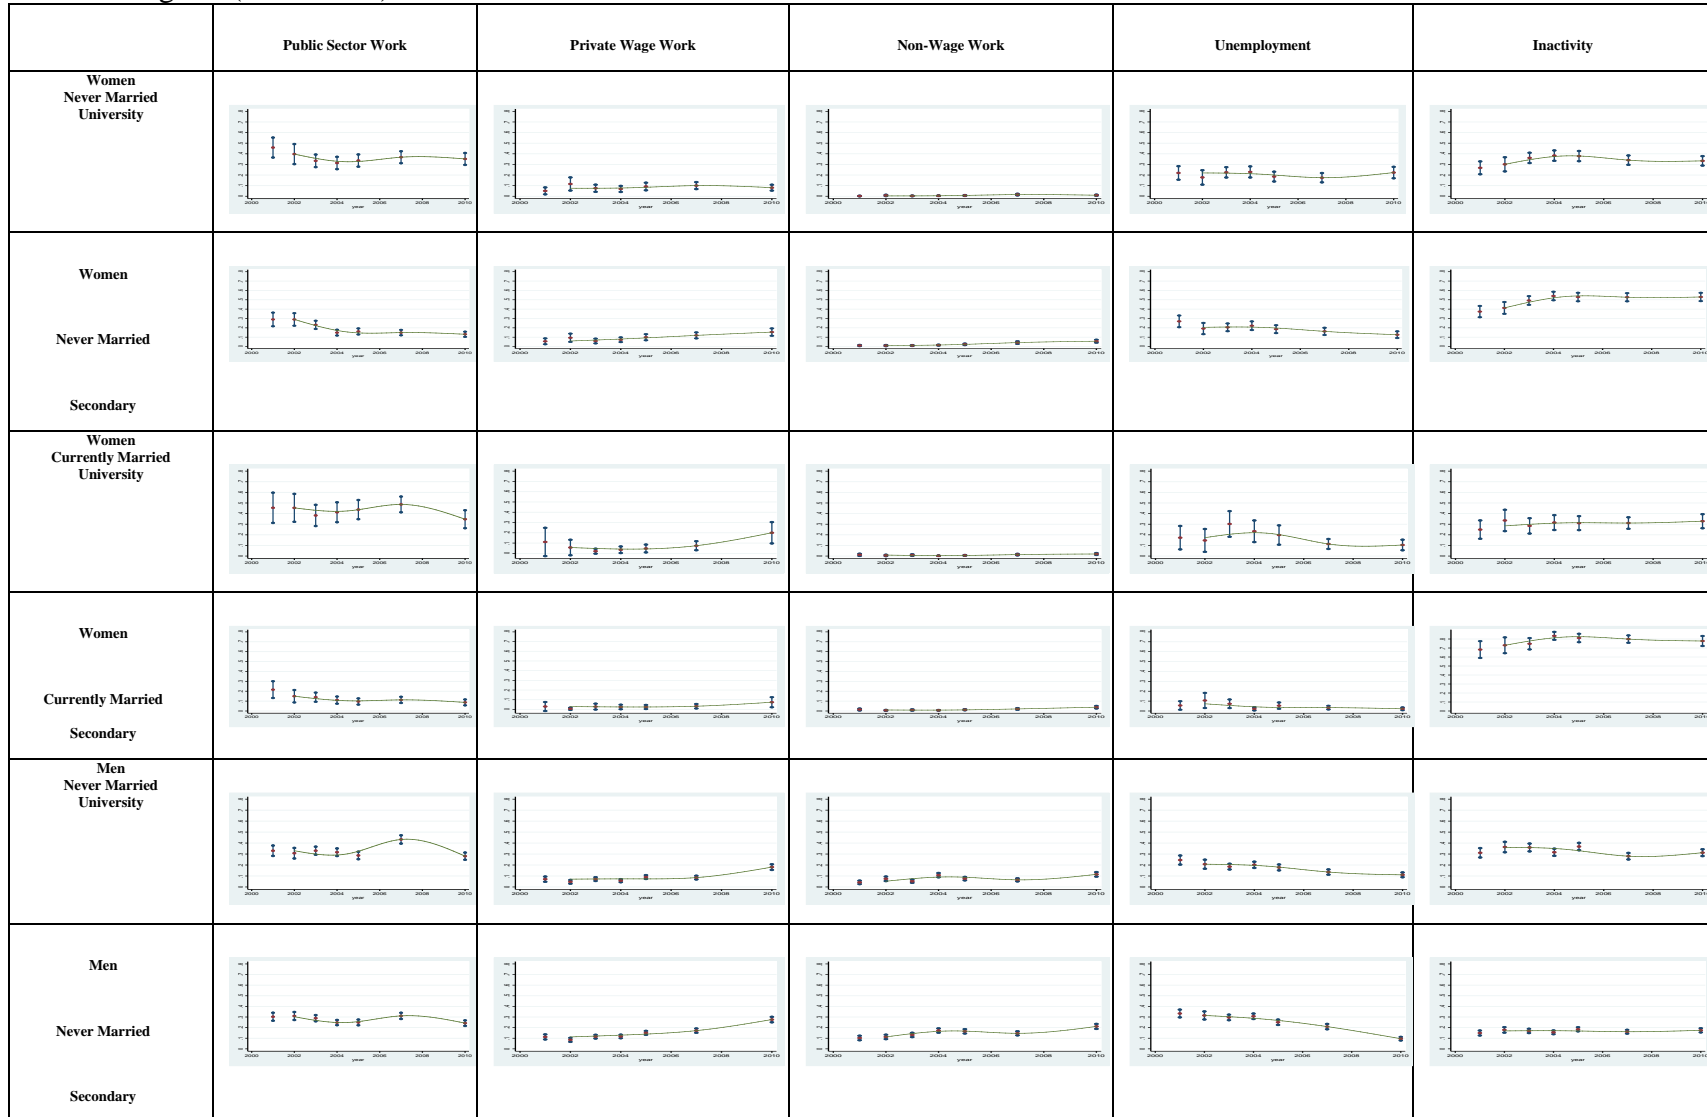

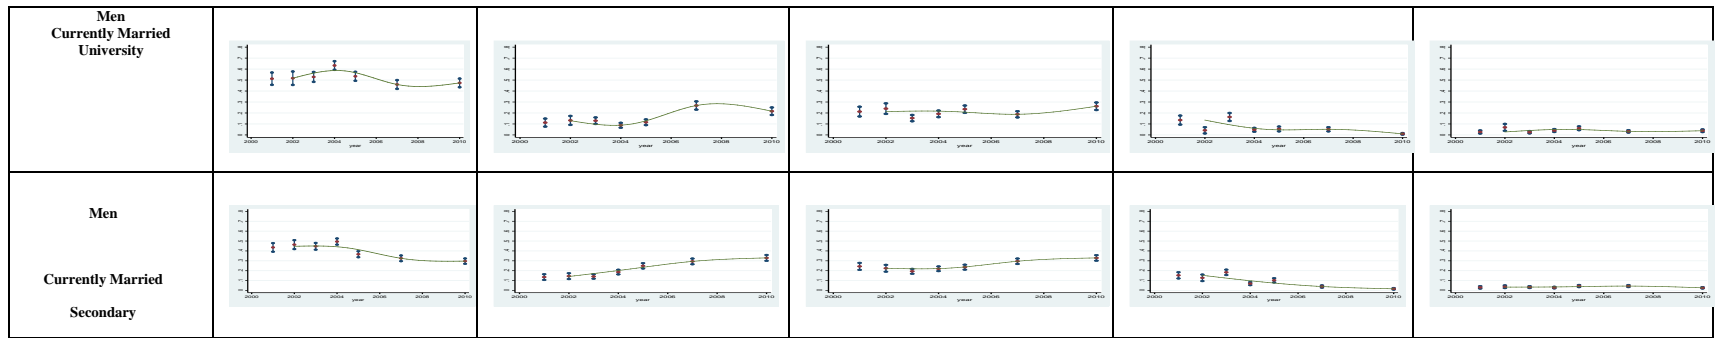

**Panel B: Egypt (2000-2017)**

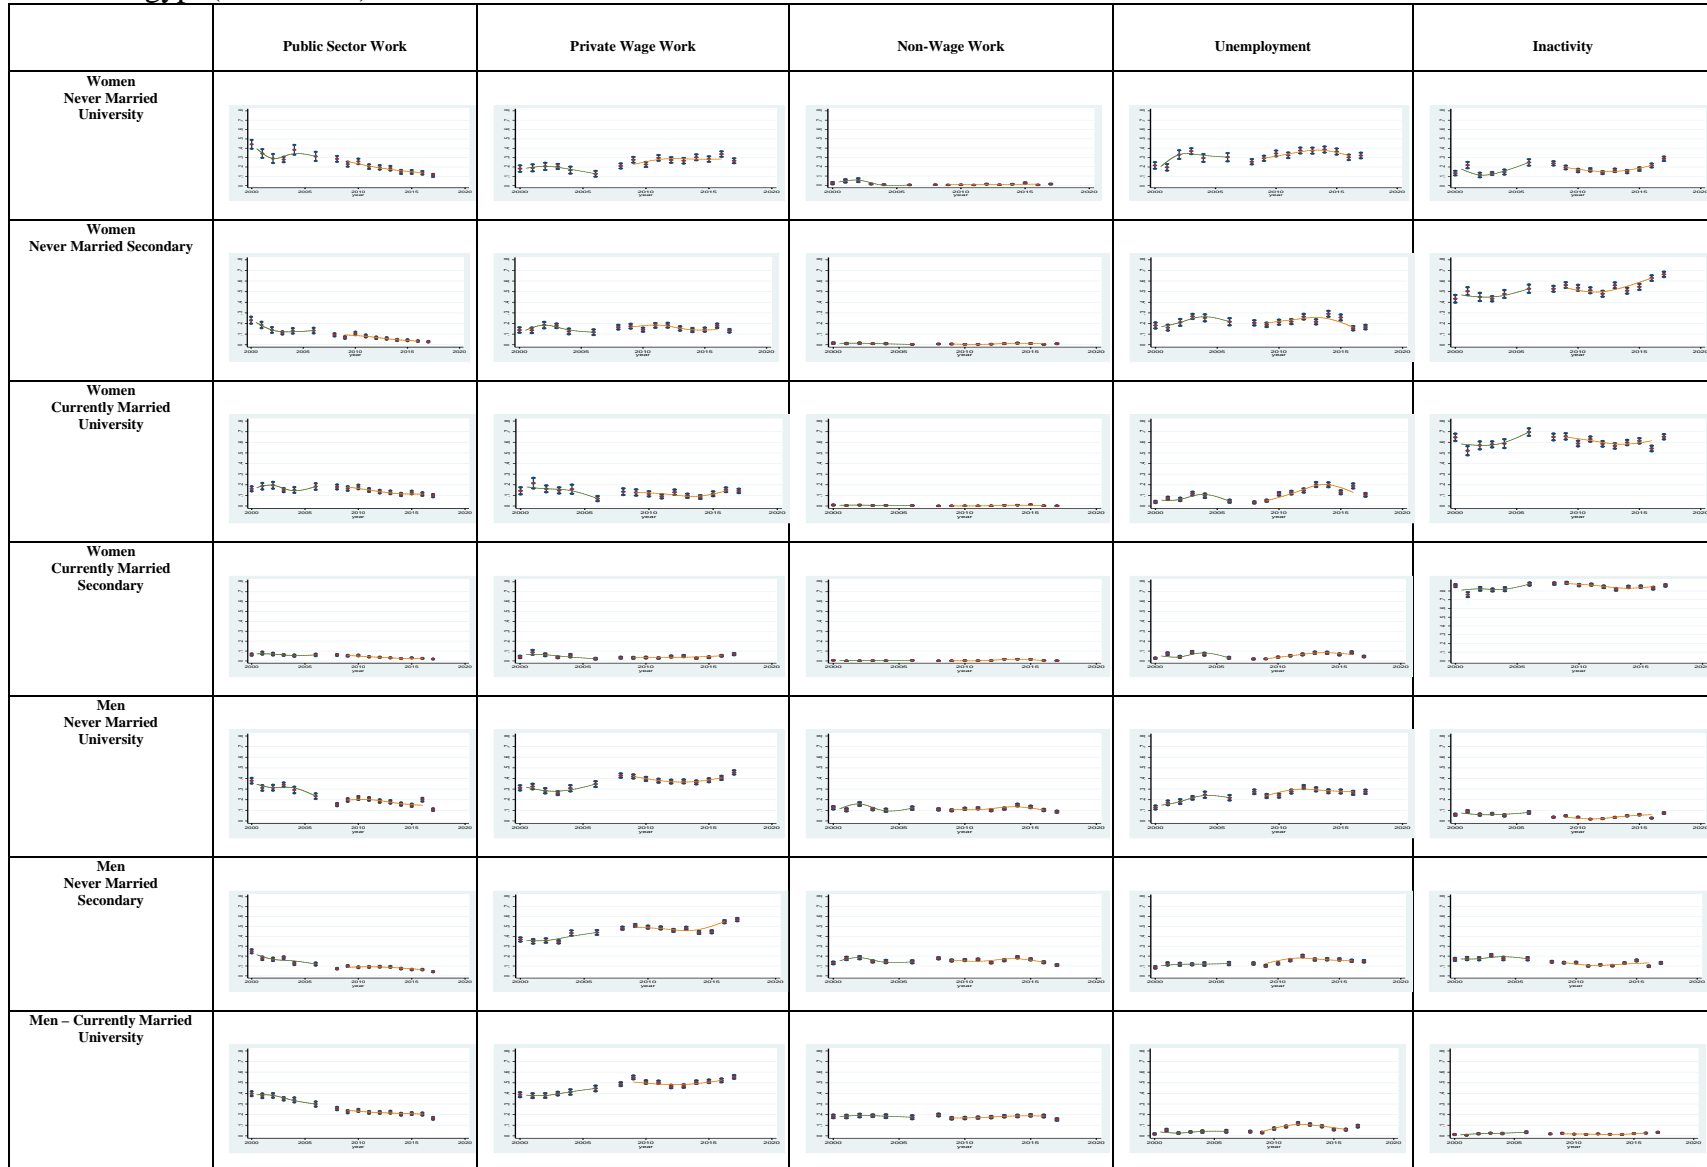



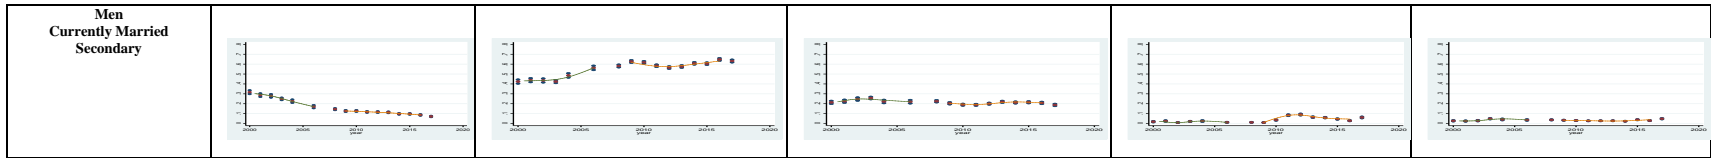

**Panel C: Jordan (2000-2016)**

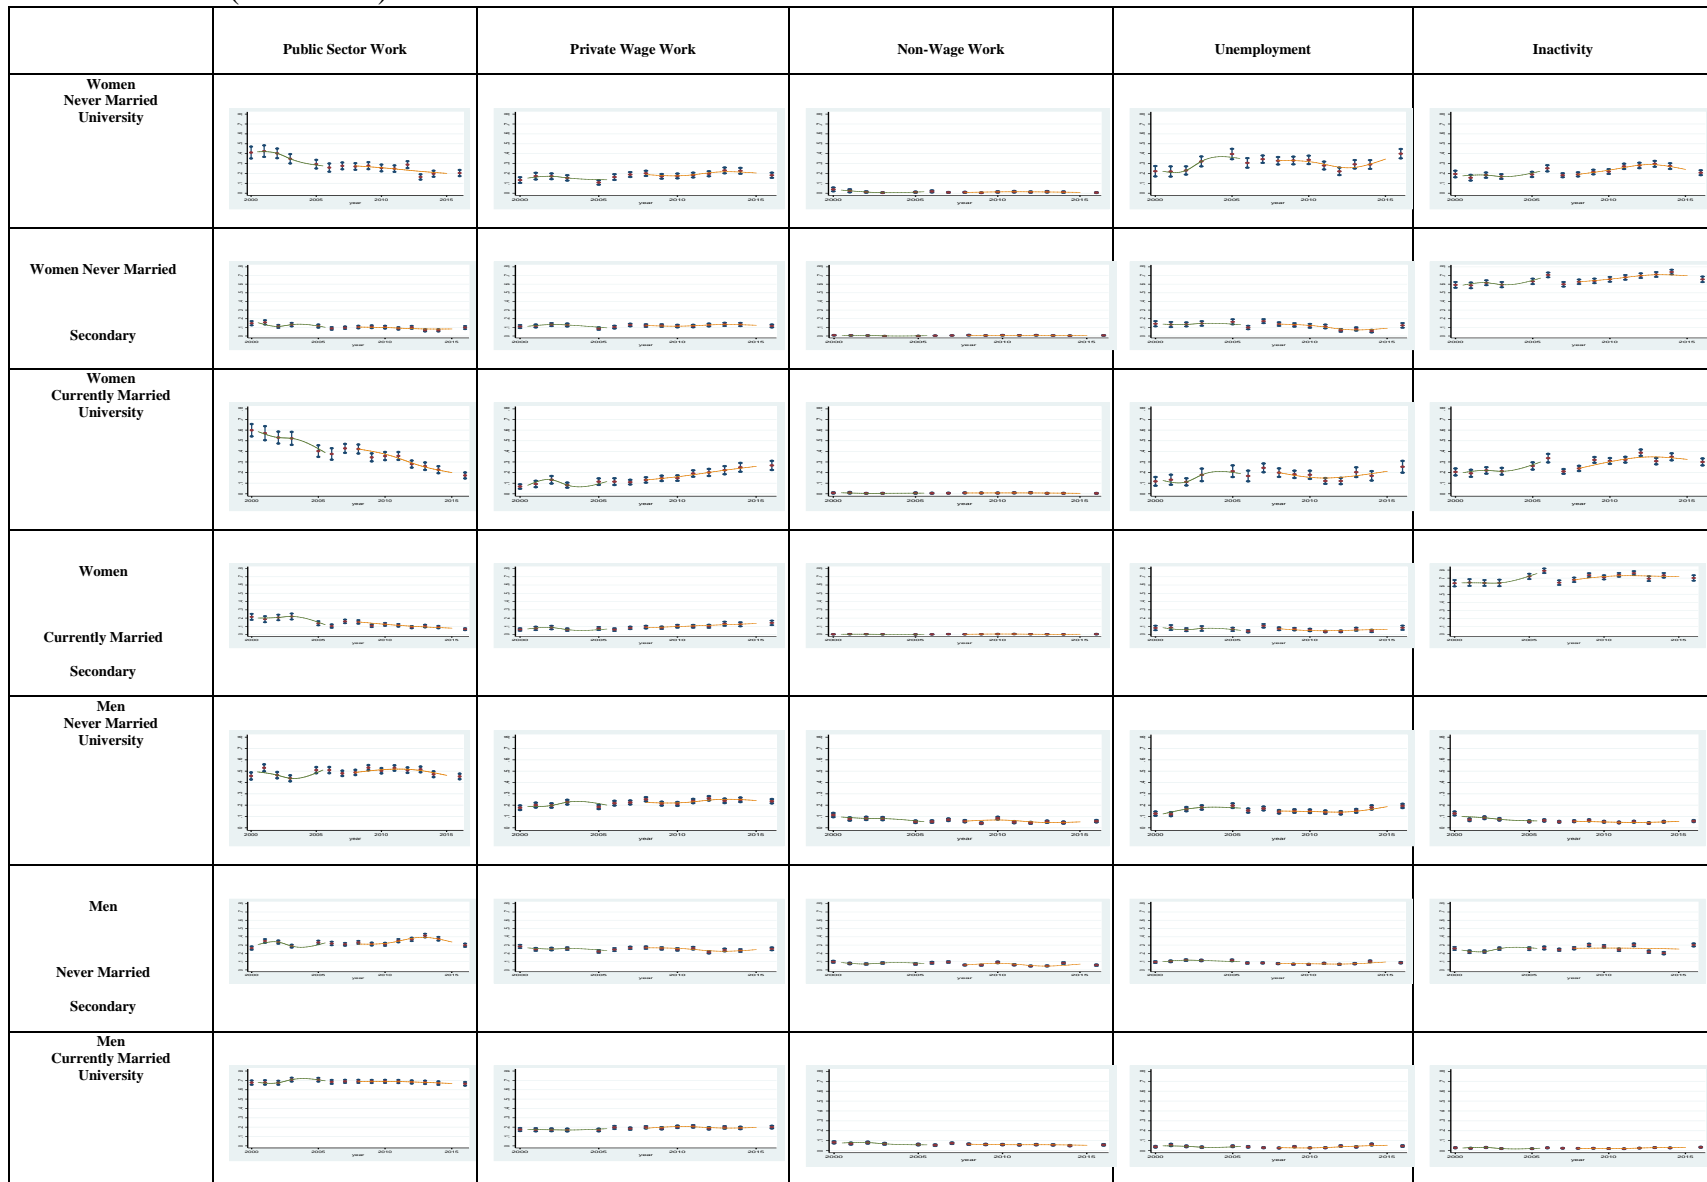

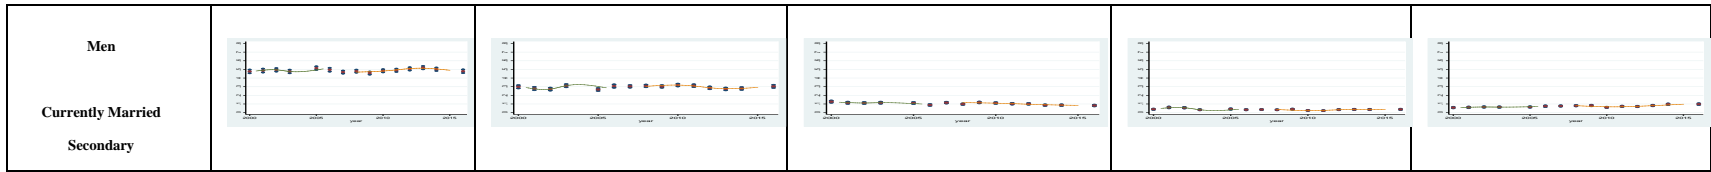

**Panel D: Tunisia (2000-2013)**

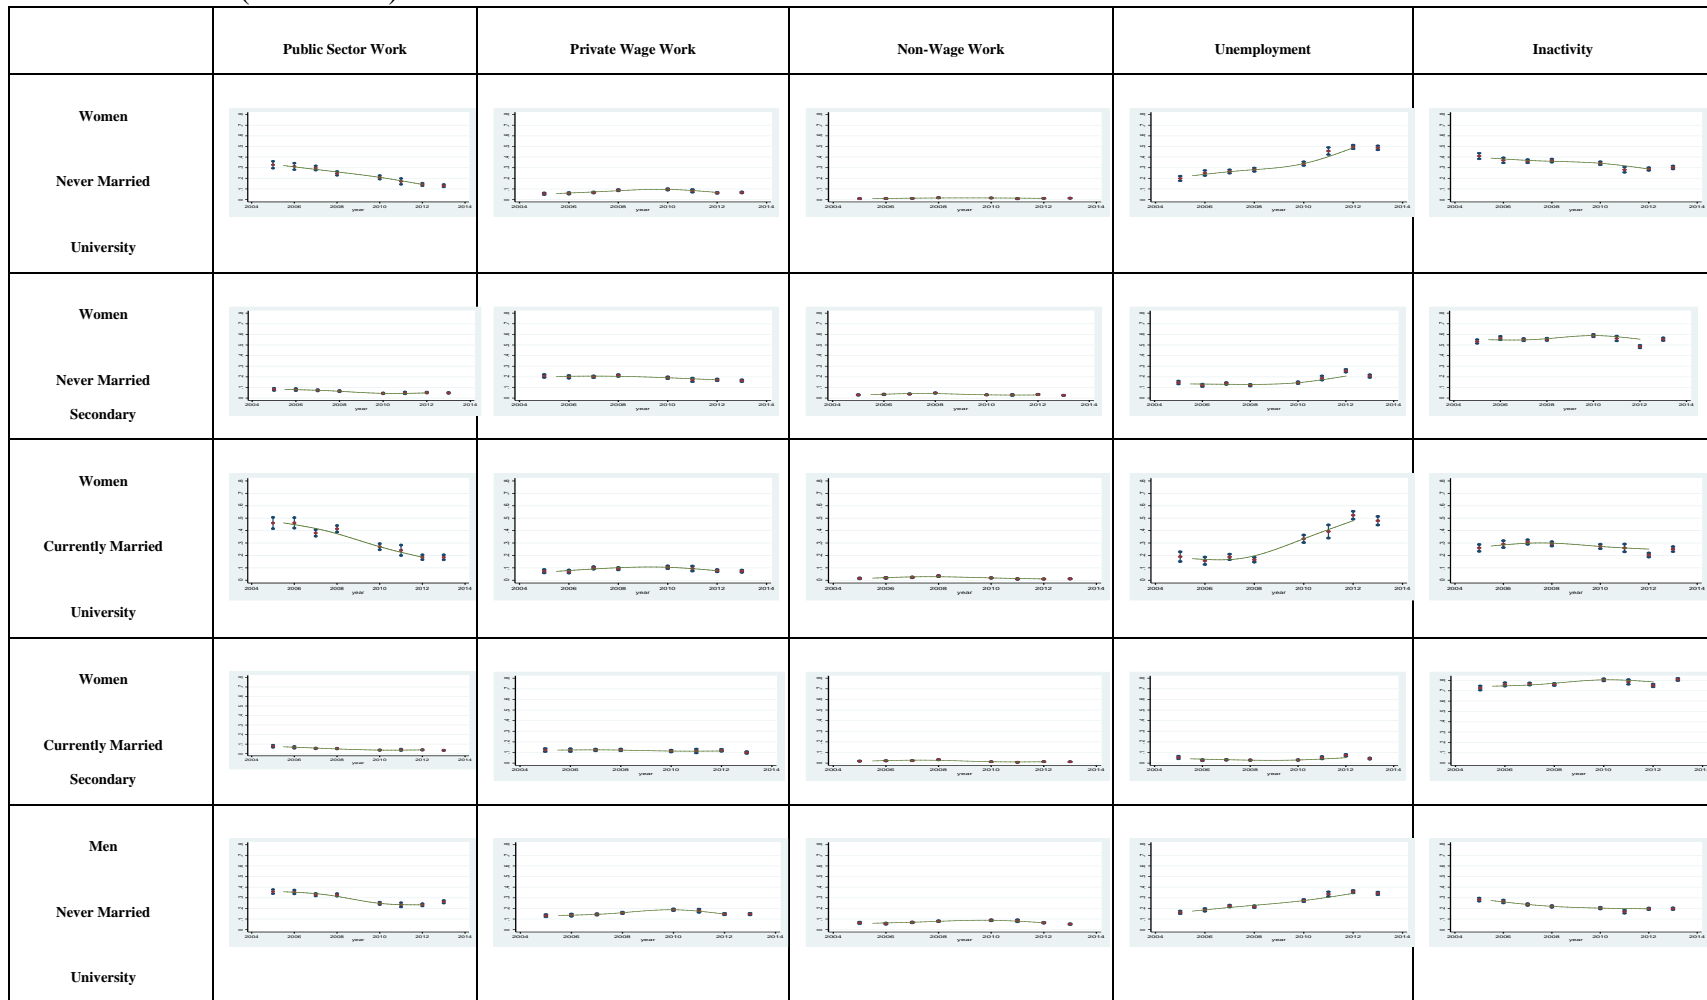

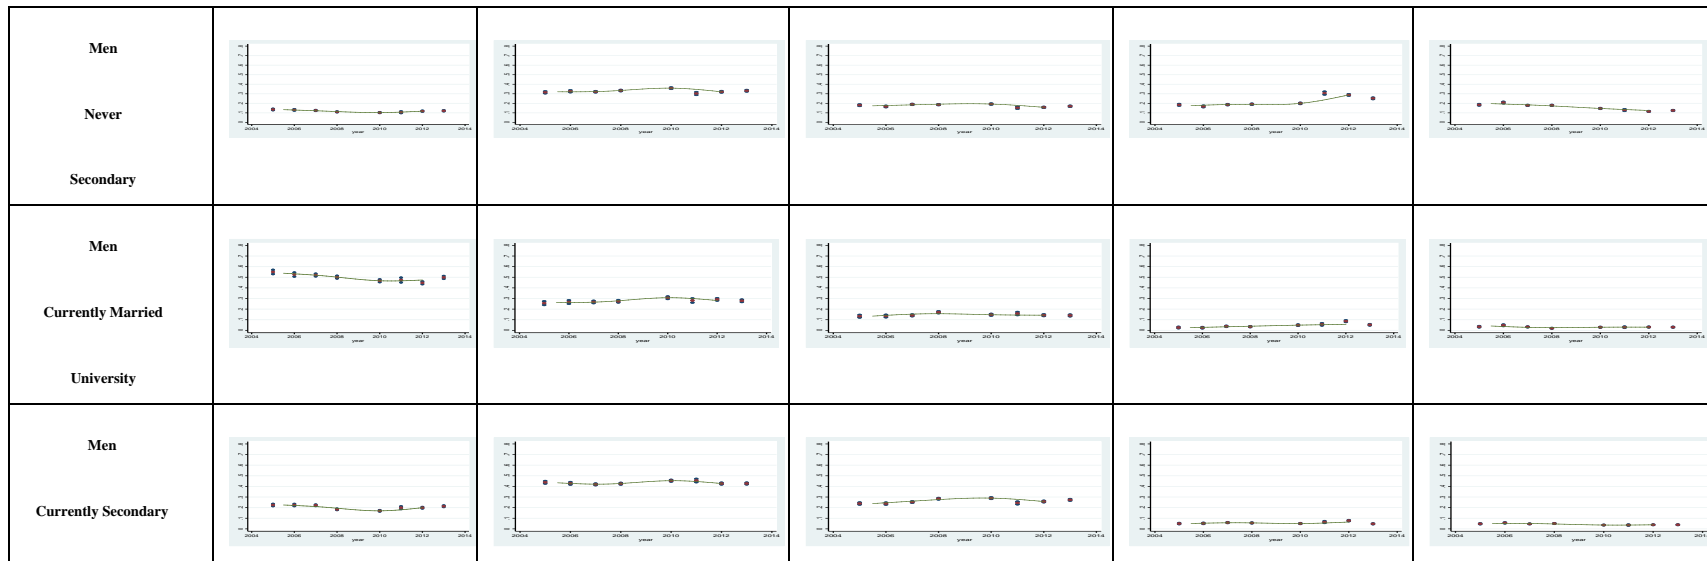

**Source:** Computed by authors based on data from official labor force surveys in each of the four countries. See data section in text for details.

**Note:** Simulations are carried out for a 20, 25 and 30-year old) university-educated female and male residing in an urban area in the region of her country that includes the capital city. Four-period splines are used to smooth fluctuations in the simulation results.

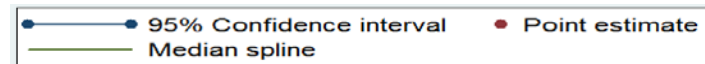

Supplement: NIHMS1686609-supplement-1.pdf [file NIHMS1686609-supplement-1.pdf]
